# Supplementary material for: Programmed catalysis within stimuli-responsive mechanically unlocked nanocavities in DNA origami tiles
Source: PubMed Central journal article supplement (PMC8179671; doi:10.1039/d0sc04108d), 2020-10-27
Supplement: SC-012-D0SC04108D-s001.pdf [file SC-012-D0SC04108D-s001.pdf]

Supporting Information

**Programmed Catalysis Within Stimuli-Responsive Mechanically Unlocked**

**Nanocavities in DNA Origami Tiles**

*Jianbang Wang, Zhixin Zhou, Zhenzhen Li and Itamar Willner\**

Institute of Chemistry, The Center for Nanoscience and Nanotechnology,  
The Hebrew University of Jerusalem, Jerusalem 91904, Israel

## Experimental Section

**Preparations of DNA origami tiles and hairpin strands.** The DNA origami tiles were assembled in TAE buffer (20 mM Tris; 20 mM acetic acid; 1 mM EDTA; pH 8.0) with 12.5 mM  $Mg^{2+}$  using 10 nM single-stranded M13mp18 phage DNA (New England Biolabs) and 100 nM short staple strands (unmodified staple strands and functional staple strands were custom-ordered, Integrated DNA Technologies). The mixture was heated to 95 °C in a thermal cycler and then allowed to cool down to 20 °C at a rate of 0.1 °C/10 s. The DNA origami tiles were purified using agarose electrophoresis (1%, 80 V, 2 h, at 0 °C) to remove the excess staple strands and were then extracted from the gel bands using Freeze 'N Squeeze spin columns. For the origami dimers, two tiles were mixed at 1:1 molar ratio and kept at 25 °C for 12 h. The hairpin strands (5  $\mu$ M) were annealed from 90 °C to 10 °C at a rate of 3 °C /min in TAE buffer with 6 mM  $Mg^{2+}$  and 5 mM  $Na^+$ .

**Formation of nanocavities in DNA origami tiles.** To unlock the purified  $K^+$ -ion-responsive tiles (2 nM, 80  $\mu$ L, in TAE buffer with 6 mM  $Mg^{2+}$  and 5 mM  $Na^+$ ),  $K^+$  ions (1 M, 10  $\mu$ L) were applied in the presence of the hairpin strands  $H_1$  and  $H_2$  (100 nM, 10  $\mu$ L) and the sample was allowed to react for 10 hours at 25 °C. For the reverse process to re-lock the cavities, the anti-helper strands ( $H_{1a}'/H_{1b}'/H_{2a}'/H_{2b}'$ ) (500 nM, 10  $\mu$ L) were added to the sample to remove the strands  $H_1$  and  $H_2$  (25 °C for 2 h) and crown-ether (CE, 55 mM, 900  $\mu$ L) was used to separate the G-quadruplex by removing the  $K^+$  ions. The sample was centrifuged four times to remove the excess helpers/anti-helpers and CE (100 k NMWL, 3000  $\times$  g, 10 min). For the control measurements, only the  $K^+$  ions or the helper hairpin strands  $H_1/H_2$  were added into the origami solutions.

For the FRET test, the strand  $H_{a-F}$ , internally modified with Cy3, and the anchor strand  $A_{1-F}$  modified with Cy5 were used for preparation of the  $K^+$ -ion-responsive origami tile. The fluorescence features of the locked configuration of the origami tiles, 24 nM, were measured at  $\lambda_{ex} = 532$  nm. Subsequently, the origami tiles were unlocked by  $K^+$  ions and the added hairpins  $H_1$  and  $H_2$ . The fluorescence spectrum of the origami tiles in the open cavity-containing configuration was measured ( $\lambda_{ex} = 532$  nm). For deriving the calibration curve, mixtures of the strands  $H_{a-F}$  (24 nM) and  $A_{1-F}$  (24 nM) were subjected to variable concentrations of  $H_{1-F}$  (0, 6, 12, 18, and 24 nM) and their fluorescence spectra of the resulting hybrids were measured ( $\lambda_{ex} = 532$  nm).

To unlock the ATP-responsive origami tiles (2 nM, 80  $\mu$ L, in TAE buffer with 6 mM  $Mg^{2+}$  and 5 mM  $Na^+$ ), the sample was treated with ATP (50 mM, 10  $\mu$ L) and the helper strands  $H_1$  and  $H_2$  (100 nM, 10  $\mu$ L) allowed to react for 10 hours at 25 °C. For the reverse re-locking process, the anti-helper strands ( $H_{1a}'/H_{1b}'/H_{2a}'/H_{2b}'$ ) (500 nM, 10  $\mu$ L) were added into the sample to remove the strands  $H_1$  and  $H_2$  (25 °C for 2 h) and the counter-ATP aptamer strand C-ATP<sub>a</sub> (200 nM, 10  $\mu$ L) was added to remove ATP from the ATP-aptamer complex followed by centrifuging to remove the free ATP from the sample (100 k NMWL, 3000  $\times$  g, 10 min, four times). Then the anti-C-ATP<sub>a</sub> strand, C-ATP<sub>a</sub>' (1  $\mu$ M, 10  $\mu$ L) was applied to remove C-ATP<sub>a</sub> and to form the M/M' locking duplex units of the "window". For the control measurements, only the ATP or the helper

hairpin strands H<sub>1</sub>/H<sub>2</sub> were used.

To unlock the pH-responsive origami tiles (2 nM, 80  $\mu$ L, in TAE buffer with 6 mM Mg<sup>2+</sup> and 5 mM Na<sup>+</sup>), the sample was subjected to the helper strands H<sub>1</sub> and H<sub>2</sub> (50 nM, 20  $\mu$ L) at pH = 9.5 and allowed to react for 10 hours at 25 °C. For the reverse re-locking process, the anti-helper strands (H<sub>1a</sub>'/H<sub>1b</sub>'/H<sub>2a</sub>'/H<sub>2b</sub>') (500 nM, 10  $\mu$ L) were added into the sample to remove the strands H<sub>1</sub> and H<sub>2</sub> (25 °C for 2 h) at pH 6. For the control measurements, the origami tiles were treated at pH = 9.5 or the helper strands H<sub>1</sub>/H<sub>2</sub>.

**Programmed Formation of nanocavities in the ATP-/K<sup>+</sup>-ion-responsive origami dimers.** The dimer mixture composed of ATP-responsive (without marker) and K<sup>+</sup>-ion-responsive (with four-hairpin labeled marker) tiles (state I, 2 nM, 80  $\mu$ L, in TAE buffer with 6 mM Mg<sup>2+</sup> and 5 mM Na<sup>+</sup>) were prepared. The ATP (50 mM, 2.5  $\mu$ L) and helper hairpin strands, H<sub>1</sub>/H<sub>2</sub> (100 nM, 2.5  $\mu$ L), were used to unlock the unmarked tile of the dimer (state I, 2 nM, 20  $\mu$ L), state II. To unlock state I of the dimer mixture to state III, K<sup>+</sup> ions (1 M, 2.5  $\mu$ L) and the helper hairpin strands, H<sub>1</sub>/H<sub>2</sub> (100 nM, 2.5  $\mu$ L), were added to the tiles mixture in state I (2 nM, 20  $\mu$ L). For unlocking the nanocavities in both tiles of the dimer (state I, 2 nM, 20  $\mu$ L) into state IV, ATP (50 mM, 3  $\mu$ L), K<sup>+</sup> ions (1 M, 3  $\mu$ L) and the helper strands H<sub>1</sub>/H<sub>2</sub> (150 nM, 4  $\mu$ L) were added into the sample to yield the two-cavity-containing dimers in state IV.

**Programmed generation of the nanocavities in the pH-/K<sup>+</sup>-ion-responsive origami dimers.** For the generation of the nanocavities in the unmarked pH-responsive tile, the dimers in state I (2 nM in 20  $\mu$ L of TAE buffer that included 6 mM Mg<sup>2+</sup> ions and 5 mM Na<sup>+</sup> ions) were treated with helper hairpin strands, H<sub>1</sub>/H<sub>2</sub> (50 nM, 5  $\mu$ L) at pH = 9.5 to unlock the unmarked pH-responsive tile to yield state II. To generate the nanocavities in the marked G-quadruplex-responsive tile, the mixture in state I (2 nM, 20  $\mu$ L) was treated with K<sup>+</sup> ions (1 M, 2.5  $\mu$ L) and the helper strands, H<sub>1</sub>/H<sub>2</sub> (100 nM, 2.5  $\mu$ L) to unlock the cavities and yield state III. For opening the nanocavities in the two tiles (state I, 2 nM, 20  $\mu$ L) was treated with K<sup>+</sup> ions (1 M, 2.5  $\mu$ L) and the helper strands H<sub>1</sub> and H<sub>2</sub> solution (200 nM, 2.5  $\mu$ L) at pH = 9.5. The mixture was allowed to react for 10 hours at 25 °C to yield state IV.

**Switchable catalysis in the nanocavities of the single DNA origami tiles.** For switching the catalytic process in ATP-responsive tiles, the ATP-responsive origami tiles functionalized with the E<sub>1a</sub> and E<sub>1b</sub> were prepared (30 nM, 200  $\mu$ L). To induce the opening of the nanocavities and to activate the Mg<sup>2+</sup>-ion-dependent DNAzyme in the nanocavity, the tiles were treated with the ATP (60 mM, 20  $\mu$ L) and the helper hairpins H<sub>1</sub>/H<sub>2</sub> (1.5  $\mu$ M, 20  $\mu$ L) for 10 hours at 25 °C. To a sample, 49  $\mu$ L of 15 nM, of the open-cavity origami tiles was added with the ROX/BHQ2-modified substrate S<sub>1</sub> (100  $\mu$ M, 1  $\mu$ L) and the catalytic activity of the DNAzyme was probed by following the fluorescence of the ROX modified fragmented product ( $\lambda_{ex}$  = 550 nm). To reclose the open cavity tiles, the system was treated with the blocker strands B<sub>1a</sub>/B<sub>1b</sub> (3  $\mu$ M, 10  $\mu$ L) and the system was allowed to anneal from 30 °C to 10 °C for 2 hours. Subsequently, the anti-helper strands, H<sub>1a</sub>'/H<sub>1b</sub>'/H<sub>2a</sub>'/H<sub>2b</sub>' (15  $\mu$ M, 10  $\mu$ L) and C-ATP<sub>a</sub> (6  $\mu$ M, 10  $\mu$ L) were added to the system that was allowed to react for 2 hours. The resulting tiles were

four times centrifuged to remove the free ATP from the sample (100 k NMWL, 3000 × g, 10 min), and the strand C-ATP<sub>a</sub>' (12 μM, 10 μL) and the anti-blocker strands B<sub>1a</sub>'/B<sub>1b</sub>' (10 μL, 6 μM) were added to the system to relock the cavities to yield the initial state tiles. The catalytic functions of the system were checked as described above. The re-opening and reclosure of the cavities were performed by repeating the cycle and probing the catalytic activities of the system in the open/closed nanocavity states.

For switching the catalytic process in K<sup>+</sup>-ion-responsive tiles, the origami tiles functionalized with the E<sub>2a</sub> and E<sub>2b</sub> were prepared (30 nM, 200 μL). The tiles were treated with the K<sup>+</sup> ions (1.2 M, 20 μL) and the helper hairpins H<sub>1</sub>/H<sub>2</sub> (1.5 μM, 20 μL) for 10 hours at 25 °C. To a sample, 49 μL of 15 nM, of the open-cavity origami tiles was added with the Cy5/BHQ2-modified substrate S<sub>2</sub> (100 μM, 1 μL) and the catalytic activity of the DNAzyme was probed by following the fluorescence of the Cy5 modified fragmented product ( $\lambda_{\text{ex}} = 630 \text{ nm}$ ). To reclose the open cavity tiles, the system was treated with the blocker strands B<sub>2a</sub>/B<sub>2b</sub> (1 μM, 30 μL) and the system was allowed to anneal from 30 °C to 10 °C for 2 hours. Subsequently, the anti-helper strands, H<sub>1a</sub>'/H<sub>1b</sub>'/H<sub>2a</sub>'/H<sub>2b</sub>' (5 μM, 30 μL) and crown-ether (CE, 57 mM, 2100 μL) were added to the system that was allowed to react for 2 hours at 25 °C to relock the cavities. The resulting tiles were washed and, centrifuged four times, to remove the excess strands and CE from the sample (100 k NMWL, 3000 × g, 10 min). The sample was treated with the anti-blocker strands B<sub>2a</sub>'/B<sub>2b</sub>' (30 μL, 2 μM) to regenerate the initial state. The catalytic functions of the system were examined as described above. The re-opening and reclosure of the cavities were performed by repeating the cycle and probing the catalytic activities of the system in the open/closed nanocavity states.

For switching the catalytic process by pH-responsive tiles, the origami tiles functionalized with the E<sub>3a</sub> and E<sub>3b</sub> were prepared (30 nM, 200 μL). To induce the opening of the nanocavities and to activate the Mg<sup>2+</sup>-ion-dependent DNAzyme in the nanocavity, the tiles were treated with the helper hairpins H<sub>1</sub>/H<sub>2</sub> (3 μM, 10 μL) for 10 hours at pH = 9.5. To a sample, 49 μL of 15 nM, of the open-cavity origami tiles was added the FAM/BHQ1-modified substrate S<sub>3</sub> (100 μM, 1 μL) and the catalytic activity of the DNAzyme was probed by following the fluorescence of the FAM modified fragmented product ( $\lambda_{\text{ex}} = 495 \text{ nm}$ ). To reclose the open cavity tiles, the system was treated with the blocker strands B<sub>3a</sub>/B<sub>3b</sub> (3 μM, 10 μL) and the system was allowed to anneal from 30 °C to 10 °C for 2 hours. Subsequently, the anti-helper strands, H<sub>1a</sub>'/H<sub>1b</sub>'/H<sub>2a</sub>'/H<sub>2b</sub>' (15 μM, 10 μL) were added to the system that was allowed to react for 2 hours at 25 °C to relock the cavities at pH 6. The sample was subjected to the anti-blocker strands B<sub>3a</sub>'/B<sub>3b</sub>' (10 μL, 6 μM) to yield the initial state. The catalytic functions of the system were checked as described above. The re-opening and reclosure of the cavities were performed by repeating the cycle and probing the catalytic activities of the system in the open/closed nanocavity states.

**Programmed catalytic activities in the nanocavities within the ATP-/K<sup>+</sup>-ion-responsive origami dimers D<sub>1</sub>.** To induce the programmed transition of the E<sub>1a</sub>/E<sub>1b</sub> and E<sub>2a</sub>/E<sub>2b</sub>-functionalized ATP-/K<sup>+</sup>-ion-responsive dimer D<sub>1</sub> into the catalytically active dimer in state II, the dimer in state I (100 μL, 30 nM in a TAE buffer that contained

Mg<sup>2+</sup>, 6 mM, and Na<sup>+</sup>, 5 mM) was subjected to ATP (10 μL, 60 mM) and the hairpin strands H<sub>1</sub>/H<sub>2</sub> (10 μL, 1.5 μM), for a time interval of 10 hours, to unlock the nanocavities in the ATP-responsive tile, and assemble the Mg<sup>2+</sup>-ion-dependent DNAzyme in the cavities. For the programmed opening of the K<sup>+</sup>-ion-responsive tile (marked) in state I into state III, the dimer in state I (100 μL, 30 nM) was subjected to K<sup>+</sup> ions (10 μL, 1.2 M) and the hairpin strands H<sub>1</sub>/H<sub>2</sub> (10 μL, 1.5 μM), for a time interval of 10 hours, to unlock the nanocavities in the K<sup>+</sup>-ion-responsive tile, and assemble the Mg<sup>2+</sup>-ion-dependent DNAzyme in the cavities. For the programmed unlocking of the nanocavities in the two tiles of state I (100 μL, 30 nM) into state IV, the respective steps detailed for unlocking the nanocavities in the ATP-responsive tile and the K<sup>+</sup>-ion-responsive tile were applied. For the activation of the catalytic transformations in the different dimer configurations the origami mixtures were subjected to a mixture of the ROX/BHQ2-modified substrate S<sub>1</sub> (100 μM, 1 μL) and the Cy5/BHQ2-modified substrate S<sub>2</sub> (100 μM, 1 μL). The system were allowed to react for a time-interval of 6 hours at 25 °C. The fluorescence spectra of the resulting fluorophore-labeled fragments generated by the respective DNAzymes, associated with the different dimers were recorded (ROX, λ<sub>ex</sub> = 550 nm; Cy5, λ<sub>ex</sub> = 630 nm).

**Programmed catalytic activities in the nanocavities within the pH-/K<sup>+</sup>-ion-responsive origami dimers D<sub>2</sub>.** To induce the programmed transition of the E<sub>3a</sub>/E<sub>3b</sub> and E<sub>2a</sub>/E<sub>2b</sub>-functionalized pH-/K<sup>+</sup>-ion-responsive dimer D<sub>2</sub> into the catalytically active dimer in state II, the dimer in state I (100 μL, 30 nM in a TAE buffer that contained Mg<sup>2+</sup>, 6 mM, and Na<sup>+</sup>, 5 mM) was subjected to the hairpin strands H<sub>1</sub>/H<sub>2</sub> (10 μL, 1.5 μM) at pH = 9.5, for a time interval of 10 hours, to unlock the nanocavities in the pH-responsive tile, and assemble the Mg<sup>2+</sup>-ion-dependent DNAzyme in the cavities. For the programmed opening of the K<sup>+</sup>-ion-responsive tile (marked) in state I into state III, the dimer in state I (100 μL, 30 nM) was subjected to K<sup>+</sup> ions (10 μL, 1.2 M) and the hairpin strands H<sub>1</sub>/H<sub>2</sub> (10 μL, 1.5 μM), for a time interval of 10 hours, to unlock the nanocavities in the K<sup>+</sup>-ion-responsive tile, and assemble the Mg<sup>2+</sup>-ion-dependent DNAzyme in the cavities. For the programmed unlocking of the nanocavities in the two tiles of state I into state IV, the respective steps detailed for unlocking the nanocavities in the pH-responsive tile and the K<sup>+</sup>-ion-responsive tile were applied. For the activation of the catalytic transformations in the different dimer configurations the origami mixtures were subjected to a mixture of the FAM/BHQ1-modified substrate S<sub>3</sub> (100 μM, 1 μL) and the Cy5/BHQ2-modified substrate S<sub>2</sub> (100 μM, 1 μL). The system were allowed to react for a time-interval of 6 hours at 25 °C. The fluorescence spectra of the resulting fluorophore-labeled fragments generated by the respective DNAzymes, associated with the different dimers were recorded (FAM, λ<sub>ex</sub> = 495 nm; Cy5, λ<sub>ex</sub> = 630 nm).

**AFM imaging.** For the AFM measurements, 2 μL of the respective origami samples were deposited on the freshly peeled mica. After adsorbing for 5 min, the samples were imaged in an aqueous buffer solution under tapping mode using SNL-10 probes (Bruker, Multimode Nanoscope VIII).

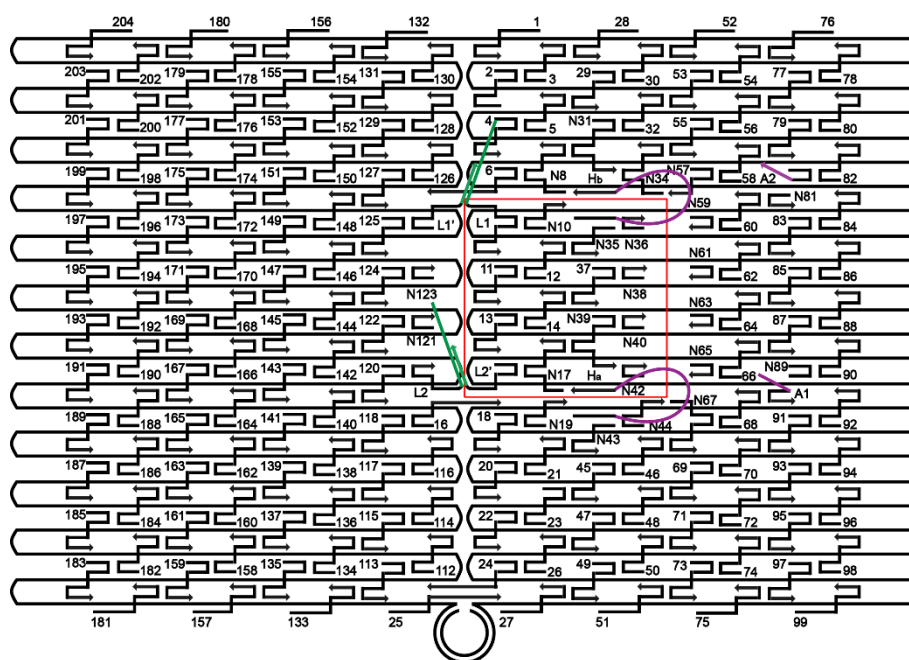

Figure S1. Schematic of the designed origami tile responsible to  $K^+$ -ion-stabilized G-quadruplexes and crown ether. The lock strands L1/L1' and L2/L2' shows in green, the handles (Ha, Hb) are purple loops and the anchoring tethers (A1, A2) are short purple lines. The red square shows the designed “nano-cavity” patch in the origami tile.

The “nano-cavity” is designed in the origami tile through opening an inner patch and binding to the nearby part of the origami tile. The patch is linked to the origami raft through the M13 strand (as hinges for its opening process) on its right side and the locks (green) on its left side. The lock strands L1 and L2 contain the G-rich sequences and form the G-quadruplexes in the presence of  $K^+$  ions. The top and bottom sides of the designed “nano-cavity” have Ha and Hb handles (purple). One end of the handle is linked to the staple strand of the origami tile and the other end of the handle is linked to the staple of the “nano-cavity”. A1 and A2 anchoring footholds are extending from the staple strands on the right side of the origami tile. The handles can hybridize with the helper strands to stabilize the path (in the form of Ha/H1/A1 and Hb/H2/A2).

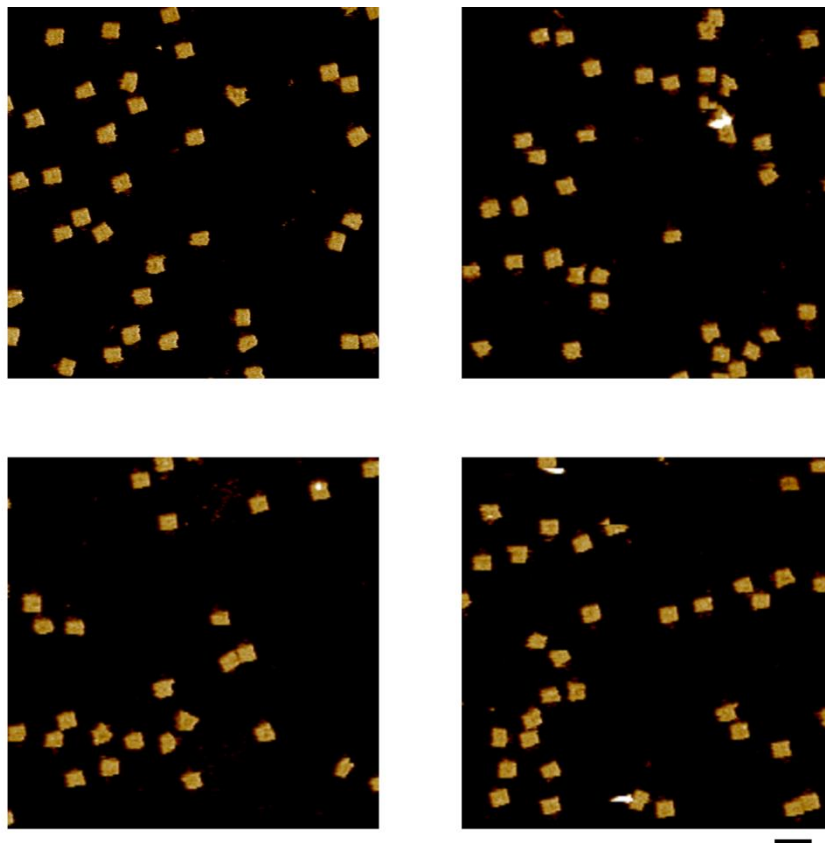

Figure S2. Four AFM images of the initial locked origami tiles before the treatment with  $K^+$  ions and the helper hairpins  $H_1/H_2$ . Scale bar: 200 nm.

Table S1. Statistical analysis of the yields of the unlocked and locked origami tiles before the treatment with  $K^+$  ions and the helper hairpins H<sub>1</sub>/H<sub>2</sub>.

| Statistical analysis |           | Unlocked | Locked | Incomplete structure |
|----------------------|-----------|----------|--------|----------------------|
| 1                    | Count     | 0        | 35     | 1                    |
|                      | Yield (%) | 0        | 97.2   |                      |
| 2                    | Count     | 0        | 33     | 1                    |
|                      | Yield (%) | 0        | 97.1   |                      |
| 3                    | Count     | 0        | 34     | 3                    |
|                      | Yield (%) | 0        | 91.9   |                      |
| 4                    | Count     | 0        | 25     | 0                    |
|                      | Yield (%) | 0        | 100    |                      |



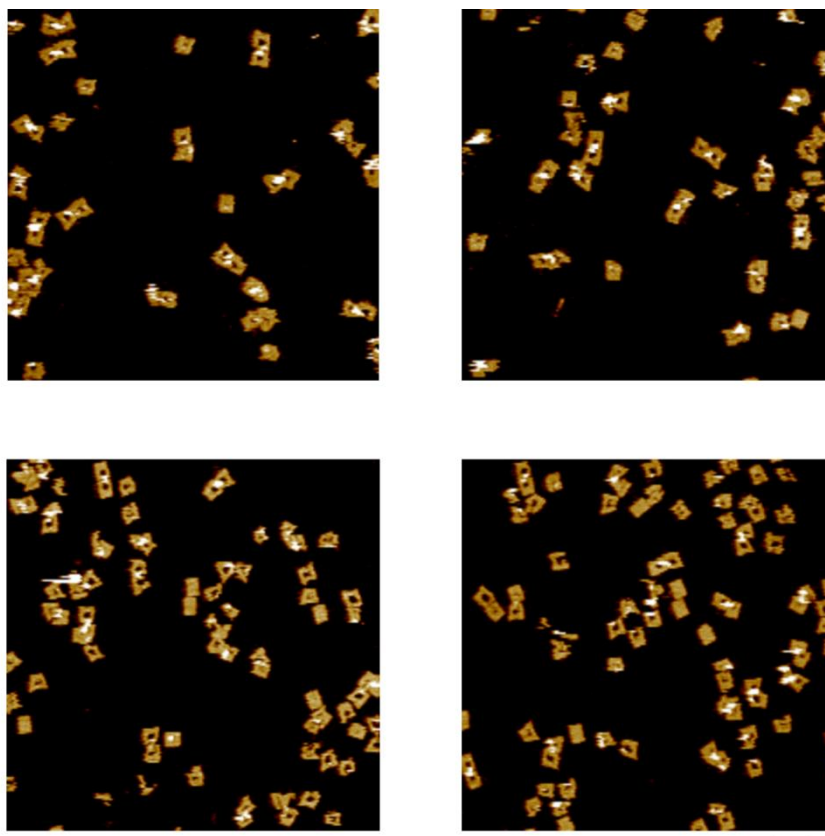

Figure S3. Four AFM images of the unlocked origami tiles upon the treatment of the tiles with  $K^+$  ions and the helper hairpins  $H_1/H_2$  (first cycle). Scale bar: 200 nm.

Table S2. Statistical analysis of the yields of the unlocked and locked origami tiles in the unlocked state after the treatment with  $K^+$  ions and the helper hairpins H<sub>1</sub>/H<sub>2</sub>.

| Statistical analysis |           | Unlocked | Locked | Incomplete structure |
|----------------------|-----------|----------|--------|----------------------|
| 1                    | Count     | 27       | 5      | 2                    |
|                      | Yield (%) | 79.4     | 14.7   |                      |
| 2                    | Count     | 26       | 6      | 2                    |
|                      | Yield (%) | 76.5     | 17.6   |                      |
| 3                    | Count     | 42       | 15     | 5                    |
|                      | Yield (%) | 67.7     | 24.2   |                      |
| 4                    | Count     | 36       | 12     | 4                    |
|                      | Yield (%) | 69.2     | 23.1   |                      |

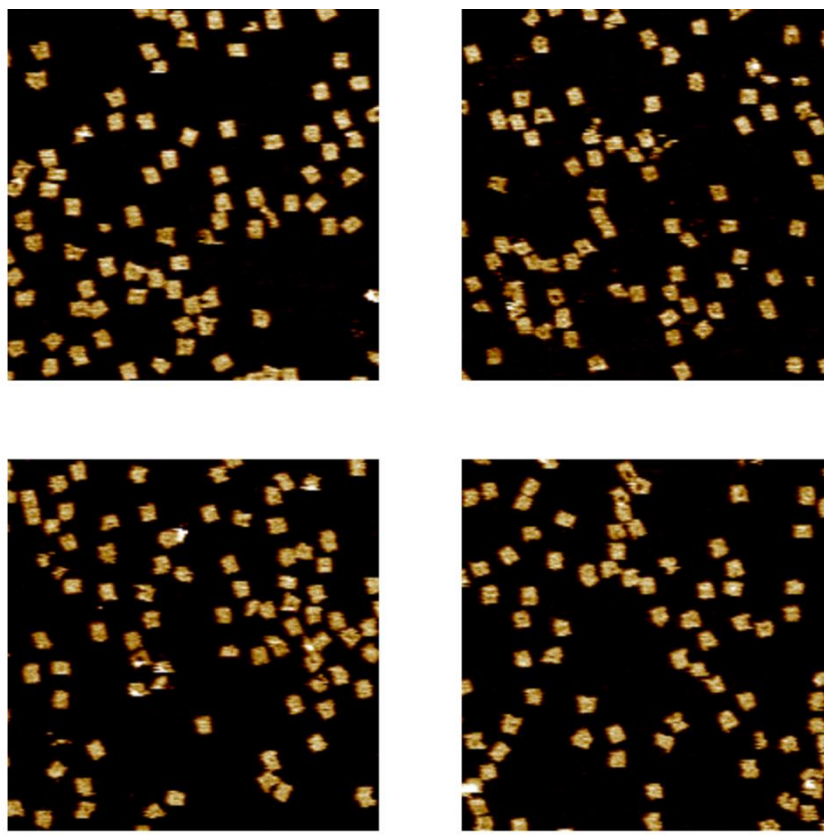

Figure S4. Four AFM images of the regenerated and locked origami tiles upon the treatment of the G-quadruplex unlocked tiles with anti-helper strands ( $H_{1a}'/H_{1b}'$  and  $H_{2a}'/H_{2b}'$ ) and crown ether (CE) (first cycle). Scale bar: 200 nm.

Table S3. Statistical analysis of the yields of the unlocked and locked origami tiles upon the treatment of the G-quadruplex unlocked tiles with the anti-helper strands ( $H_{1a}'/H_{1b}'$  and  $H_{2a}'/H_{2b}'$ ) and crown ether (CE).

| Statistical analysis |           | Unlocked | Locked | Incomplete structure |
|----------------------|-----------|----------|--------|----------------------|
| 1                    | Count     | 3        | 67     | 3                    |
|                      | Yield (%) | 4.1      | 91.8   |                      |
| 2                    | Count     | 1        | 62     | 6                    |
|                      | Yield (%) | 1.4      | 89.9   |                      |
| 3                    | Count     | 3        | 66     | 3                    |
|                      | Yield (%) | 4.2      | 91.7   |                      |
| 4                    | Count     | 2        | 65     | 8                    |
|                      | Yield (%) | 2.7      | 86.7   |                      |

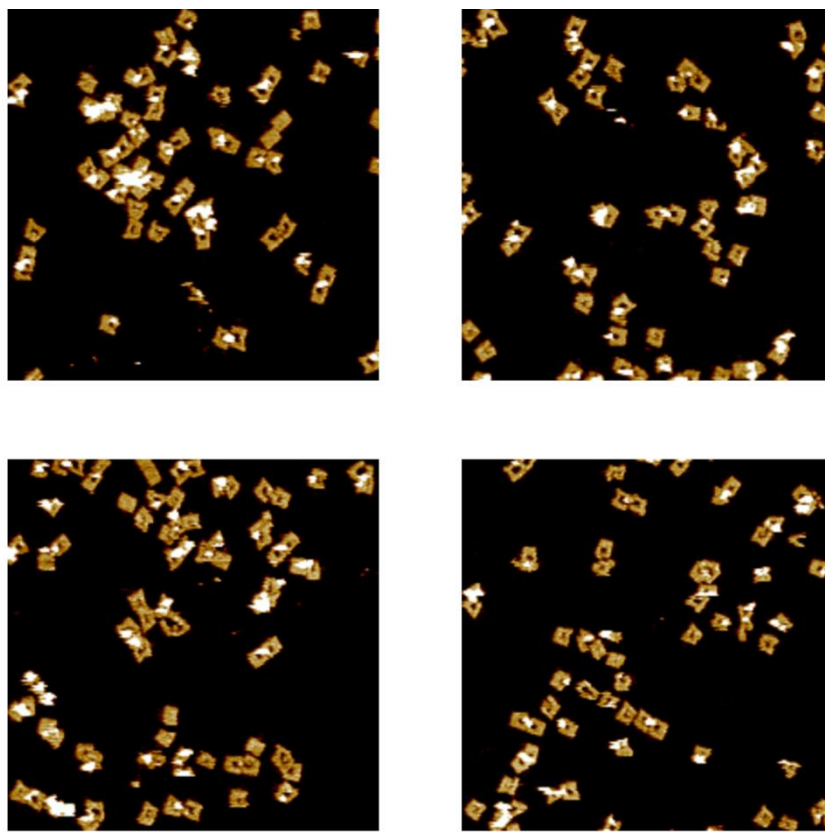

Figure S5. Four AFM images of the G-quadruplex unlocked origami tiles upon the treatment of the tiles with  $K^+$  ions and the helper hairpins  $H_1/H_2$  (second cycle). Scale bar: 200 nm.

Table S4. Statistical analysis of the yields of the unlocked and locked origami tiles upon the treatment of the locked tiles with  $K^+$  ions and the helper hairpins H<sub>1</sub>/H<sub>2</sub> (second cycle).

| Statistical analysis |           | Unlocked | Locked | Incomplete structure |
|----------------------|-----------|----------|--------|----------------------|
| 1                    | Count     | 37       | 9      | 2                    |
|                      | Yield (%) | 77.1     | 18.8   |                      |
| 2                    | Count     | 39       | 9      | 2                    |
|                      | Yield (%) | 78.0     | 18.0   |                      |
| 3                    | Count     | 34       | 8      | 5                    |
|                      | Yield (%) | 72.3     | 17.0   |                      |
| 4                    | Count     | 38       | 12     | 5                    |
|                      | Yield (%) | 69.1     | 21.8   |                      |

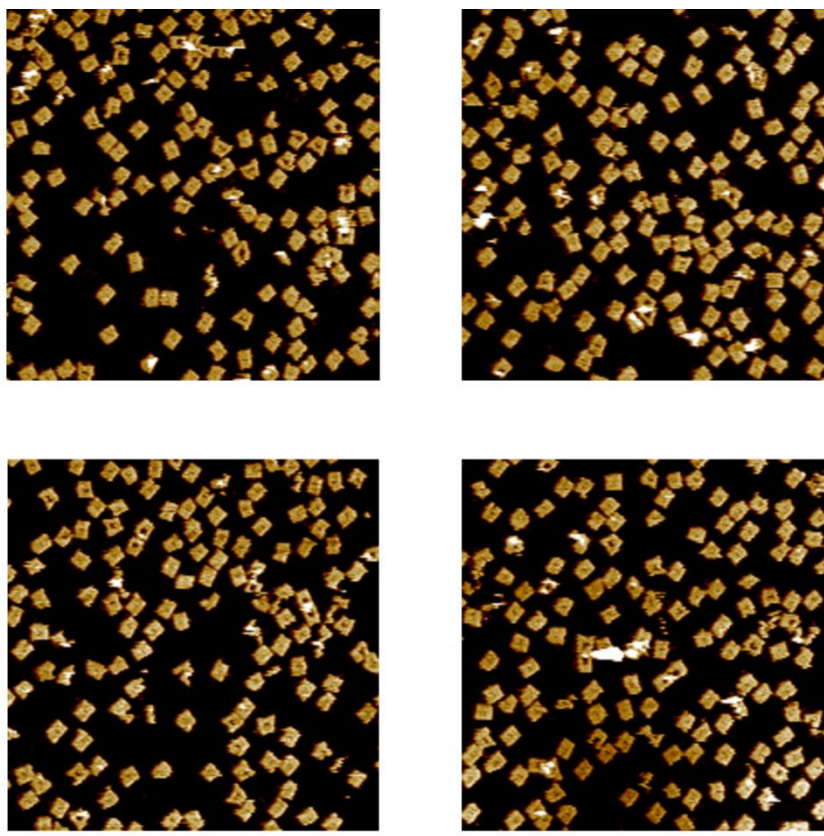

Figure S6. Four AFM images of the regenerated and locked origami tiles upon the treatment of the G-quadruplex unlocked tiles with anti-helper strands ( $H_{1a}'/H_{1b}'$  and  $H_{2a}'/H_{2b}'$ ) and CE (second cycle). Scale bar: 200 nm.

Table S5. Statistical analysis of the yields of the unlocked and locked origami tiles upon the treatment of the G-quadruplex unlocked tiles with anti-helper strands ( $H_{1a}'/H_{1b}'$  and  $H_{2a}'/H_{2b}'$ ) and CE (second cycle).

| Statistical analysis |           | Unlocked | Locked | Incomplete structure |
|----------------------|-----------|----------|--------|----------------------|
| 1                    | Count     | 14       | 99     | 14                   |
|                      | Yield (%) | 11.0     | 78.0   |                      |
| 2                    | Count     | 7        | 114    | 11                   |
|                      | Yield (%) | 5.3      | 86.4   |                      |
| 3                    | Count     | 10       | 110    | 10                   |
|                      | Yield (%) | 7.7      | 84.6   |                      |
| 4                    | Count     | 10       | 110    | 14                   |
|                      | Yield (%) | 7.5      | 82.1   |                      |



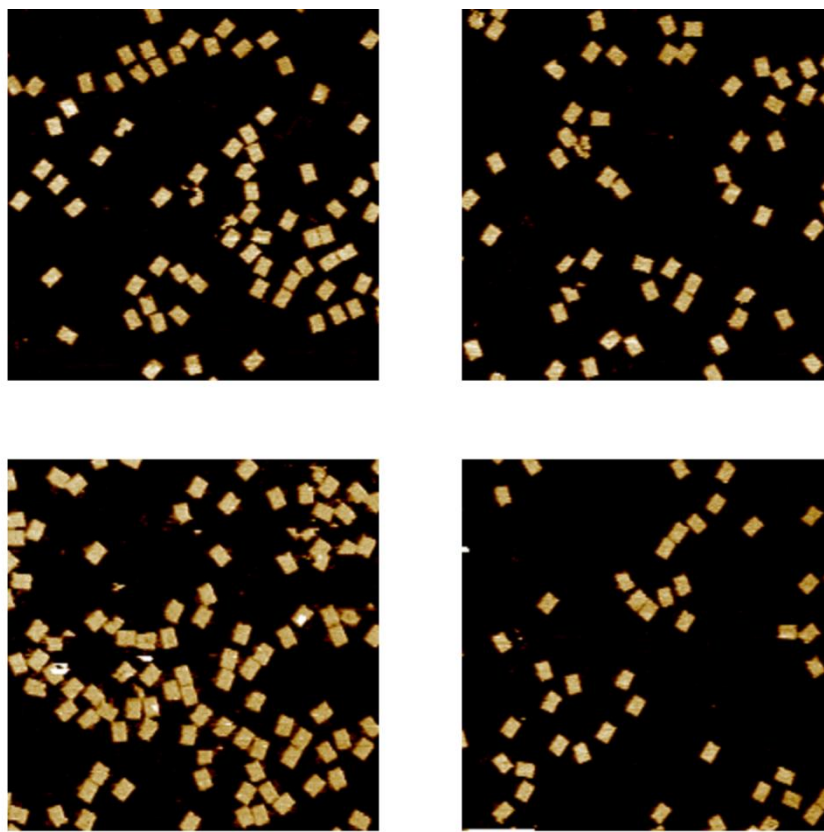

Figure S7. AFM images of the control experiment testing the unlocking of the G-quadruplex-responsive origami tiles in the presence of the helper hairpins H<sub>1</sub>/H<sub>2</sub> and in the absence of K<sup>+</sup> ions. No tiles with nanoholes are observed, implying that the K<sup>+</sup> ions are essential to unlock the origami tiles to yield the nano-cavities. Scale bar: 200 nm.

Table S6. Statistical analysis of the yields of the unlocked and locked G-quadruplex-responsive origami tiles in the presence of the helper hairpins H<sub>1</sub>/H<sub>2</sub> and in the absence of K<sup>+</sup> ions.

| Statistical analysis |           | Unlocked | Locked | Incomplete structure |
|----------------------|-----------|----------|--------|----------------------|
| 1                    | Count     | 0        | 69     | 3                    |
|                      | Yield (%) | 0        | 95.8   |                      |
| 2                    | Count     | 0        | 48     | 4                    |
|                      | Yield (%) | 0        | 92.3   |                      |
| 3                    | Count     | 0        | 41     | 0                    |
|                      | Yield (%) | 0        | 100    |                      |
| 4                    | Count     | 0        | 85     | 4                    |
|                      | Yield (%) | 0        | 95.5   |                      |

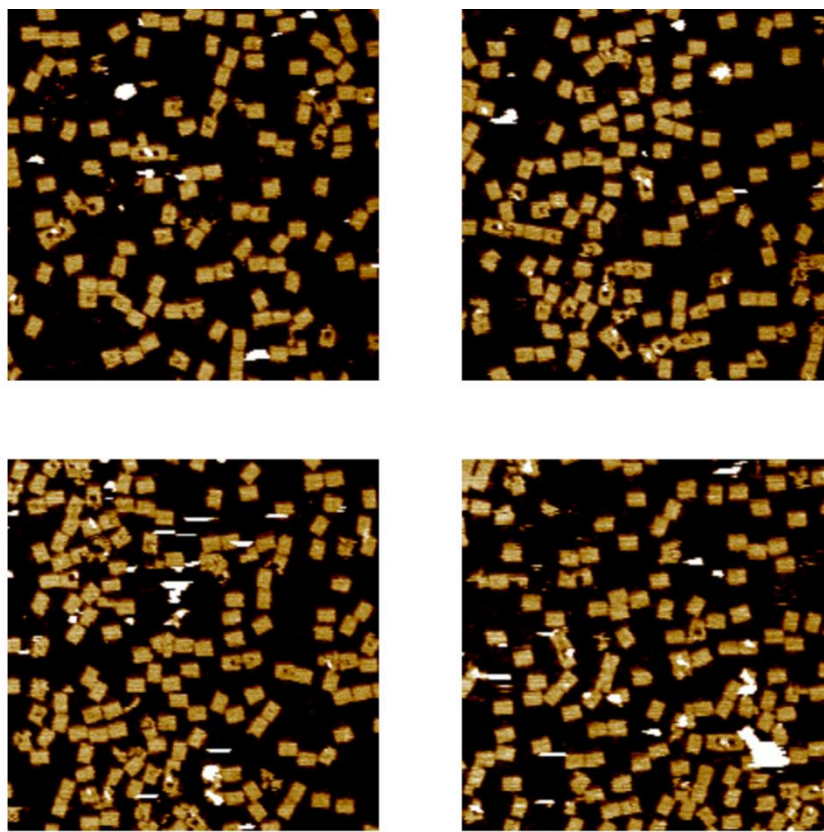

Figure S8. AFM images of the control experiment testing the  $K^+$ -ion-driven unlocking of the G-quadruplex-responsive origami tiles in the absence of the helper hairpins  $H_1/H_2$ . Only few origami tiles are with nanoholes. The results imply that the unlocked “window” exists in a flexible configuration that retains the nanohole closed without  $H_1/H_2$  that stretch the “window” to a rigid open configuration by the hairpins/handles/anchor site units. Scale bar: 200 nm.

Table S7. Statistical analysis of the yields of the unlocked and locked origami tiles in the presence of  $K^+$  ions and in the absence of the helper hairpins H<sub>1</sub>/H<sub>2</sub>.

| Statistical analysis |           | Unlocked | Locked | Incomplete structure |
|----------------------|-----------|----------|--------|----------------------|
| <b>1</b>             | Count     | 9        | 107    | 6                    |
|                      | Yield (%) | 7.4      | 87.7   |                      |
| <b>2</b>             | Count     | 9        | 95     | 5                    |
|                      | Yield (%) | 8.3      | 87.2   |                      |
| <b>3</b>             | Count     | 12       | 105    | 13                   |
|                      | Yield (%) | 9.2      | 80.8   |                      |
| <b>4</b>             | Count     | 12       | 103    | 7                    |
|                      | Yield (%) | 9.8      | 84.4   |                      |

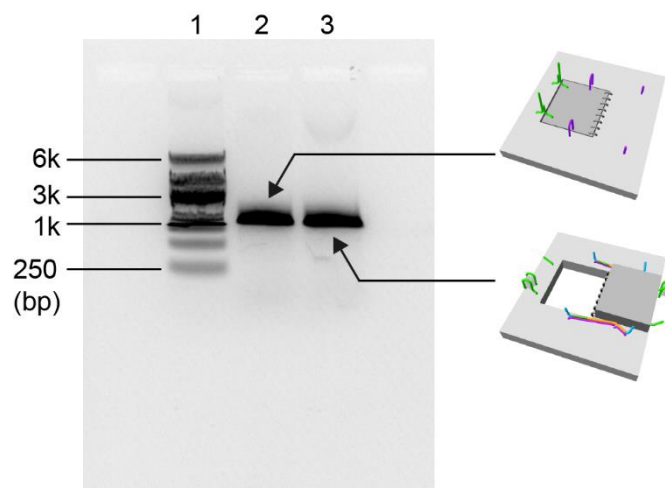

Figure S9. Electrophoretic Gel image of the locked and unlocked  $K^+$ -ion stabilized G-quadruplexes/crown ether-responsive origami tiles (lane 2 and 3, respectively). Lane 1 is 1kb reference ladder.

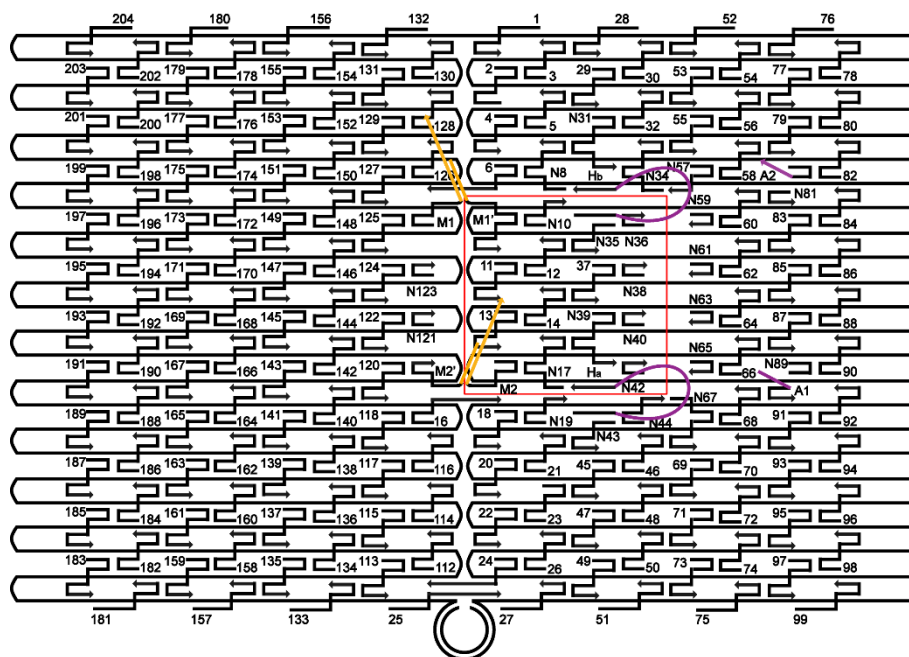

Figure S10. Schematic of the designed origami tile responsible to ATP molecules. The lock strands M1/M1' and M2/M2' shows in yellow, the handles (Ha, Hb) are purple loops and the anchoring tethers (A1, A2) are short purple lines. The red square shows the designed “nano-cavity” patch in the origami tile. The lock strands M1 and M2 contain the ATP aptamer sequences and can form the aptamer/ATP complex in the presence of ATP.

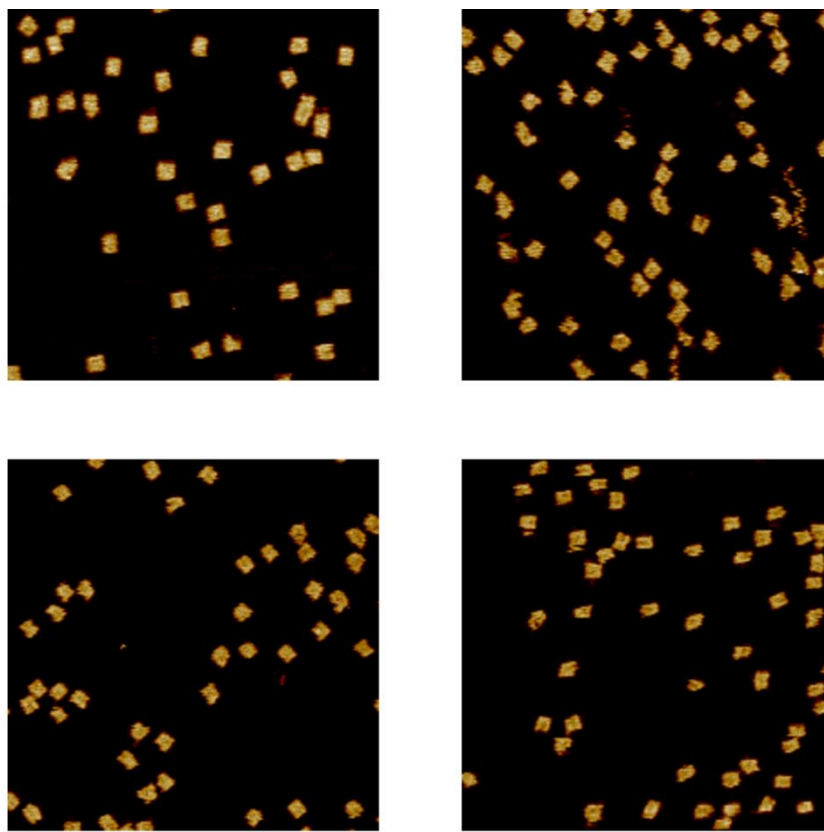

Figure S11. Four AFM images of the initial locked ATP-responsive origami tiles before the treatment of the tiles with ATP and the helper hairpins H<sub>1</sub>/H<sub>2</sub>. Scale bar: 200 nm.

Table S8. Statistical analysis of the yields of the unlocked and locked ATP-responsive origami tiles before the treatment of the tiles with ATP and the helper hairpins H<sub>1</sub>/H<sub>2</sub>.

| Statistical analysis |           | Unlocked | Locked | Incomplete structure |
|----------------------|-----------|----------|--------|----------------------|
| 1                    | Count     | 0        | 31     | 2                    |
|                      | Yield (%) | 0        | 93.9   |                      |
| 2                    | Count     | 0        | 43     | 7                    |
|                      | Yield (%) | 0        | 86.0   |                      |
| 3                    | Count     | 0        | 46     | 3                    |
|                      | Yield (%) | 0        | 93.9   |                      |
| 4                    | Count     | 0        | 38     | 1                    |
|                      | Yield (%) | 0        | 97.4   |                      |



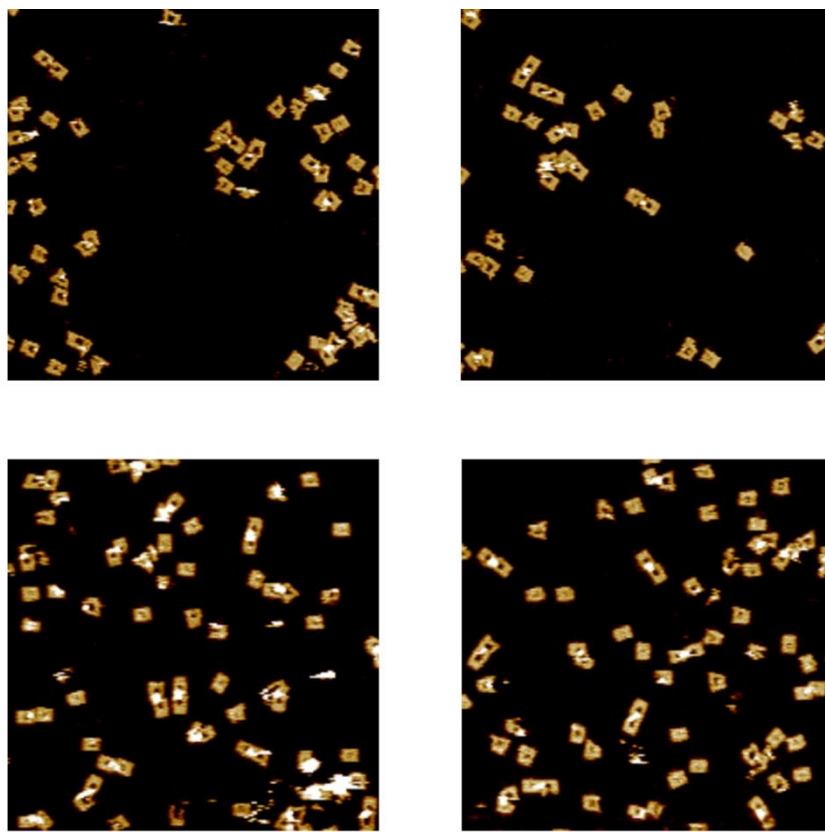

Figure S12. Four AFM images of the unlocked ATP-responsive origami tiles upon the treatment of the tiles with ATP and the helper hairpins H<sub>1</sub>/H<sub>2</sub> (first cycle). Scale bar: 200 nm.

Table S9. Statistical analysis of the yields of the unlocked and locked ATP-responsive origami tiles in the unlocked state after the treatment with ATP and the helper hairpins H<sub>1</sub>/H<sub>2</sub> (first cycle).

| Statistical analysis |           | Unlocked | Locked | Incomplete structure |
|----------------------|-----------|----------|--------|----------------------|
| 1                    | Count     | 32       | 7      | 4                    |
|                      | Yield (%) | 74.4     | 16.3   |                      |
| 2                    | Count     | 23       | 8      | 2                    |
|                      | Yield (%) | 69.7     | 24.2   |                      |
| 3                    | Count     | 40       | 14     | 5                    |
|                      | Yield (%) | 67.8     | 23.7   |                      |
| 4                    | Count     | 47       | 14     | 4                    |
|                      | Yield (%) | 72.3     | 21.5   |                      |

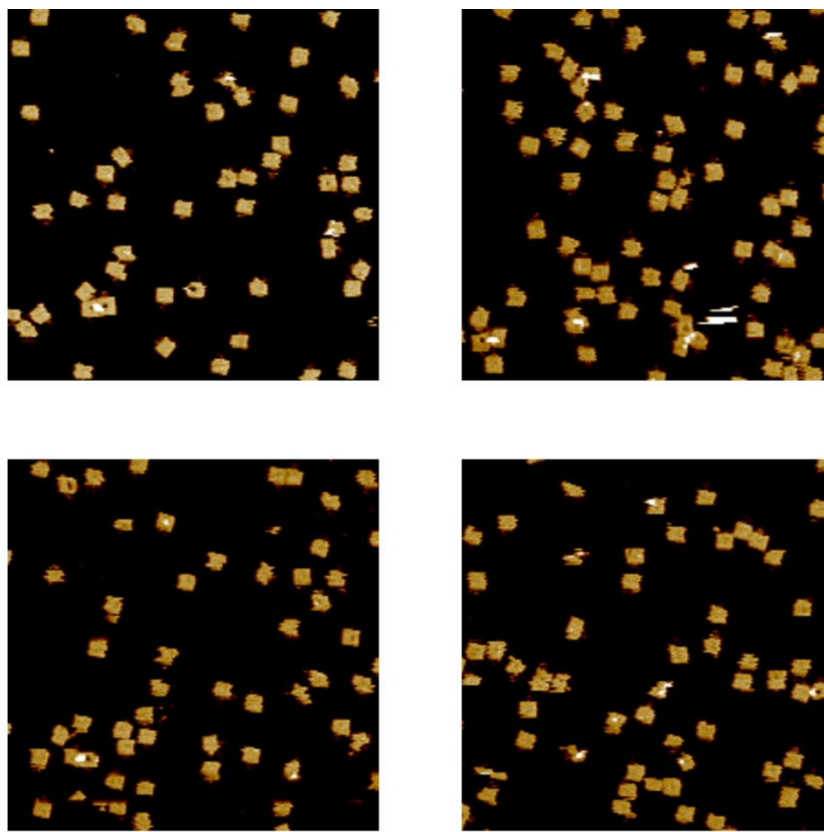

Figure S13. Four AFM images of the regenerated and locked ATP-responsive origami tiles upon the treatment of the unlocked cavity-containing tiles with the anti-helper strands ( $H_{1a}'/H_{1b}'$  and  $H_{2a}'/H_{2b}'$ ), C-ATP<sub>a</sub> and C-ATP<sub>a</sub>' (first cycle). Scale bar: 200 nm.

Table S10. Statistical analysis of the yields of the unlocked and locked ATP-responsive origami tiles upon the treatment of the unlocked tiles with anti-helper strands ( $H_{1a}'/H_{1b}'$  and  $H_{2a}'/H_{2b}'$ ), C-ATP<sub>a</sub> and C-ATP<sub>a</sub>' (first cycle).

| Statistical analysis |           | Unlocked | Locked | Incomplete structure |
|----------------------|-----------|----------|--------|----------------------|
| 1                    | Count     | 3        | 42     | 2                    |
|                      | Yield (%) | 6.4      | 89.4   |                      |
| 2                    | Count     | 3        | 54     | 5                    |
|                      | Yield (%) | 4.8      | 87.1   |                      |
| 3                    | Count     | 1        | 43     | 8                    |
|                      | Yield (%) | 1.9      | 82.7   |                      |
| 4                    | Count     | 2        | 40     | 6                    |
|                      | Yield (%) | 4.2      | 83.3   |                      |

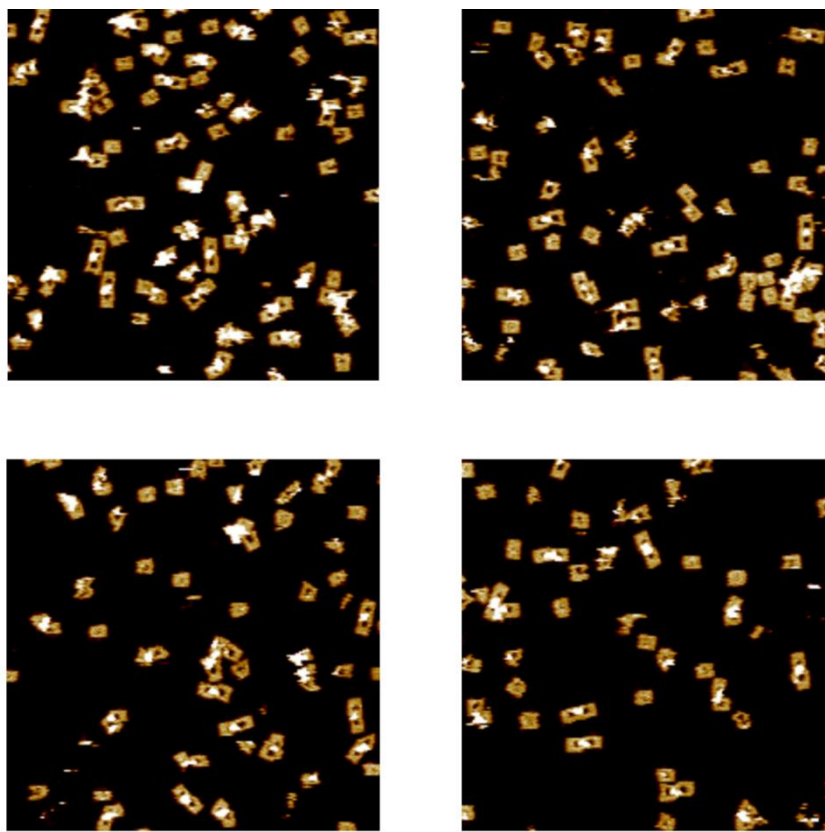

Figure S14. Four AFM images of the unlocked ATP-responsive origami tiles upon the treatment of the locked ATP-responsive tiles with ATP and the helper hairpins H<sub>1</sub>/H<sub>2</sub> (second cycle). Scale bar: 200 nm.

Table S11. Statistical analysis of the yields of the unlocked and locked ATP-responsive origami tiles upon the treatment of the locked ATP-responsive tiles with ATP and the helper hairpins H<sub>1</sub>/H<sub>2</sub> (second cycle).

| Statistical analysis |           | Unlocked | Locked | Incomplete structure |
|----------------------|-----------|----------|--------|----------------------|
| 1                    | Count     | 48       | 19     | 7                    |
|                      | Yield (%) | 64.9     | 25.7   |                      |
| 2                    | Count     | 45       | 14     | 4                    |
|                      | Yield (%) | 71.4     | 22.2   |                      |
| 3                    | Count     | 37       | 10     | 2                    |
|                      | Yield (%) | 75.5     | 20.4   |                      |
| 4                    | Count     | 38       | 9      | 5                    |
|                      | Yield (%) | 73.1     | 17.3   |                      |

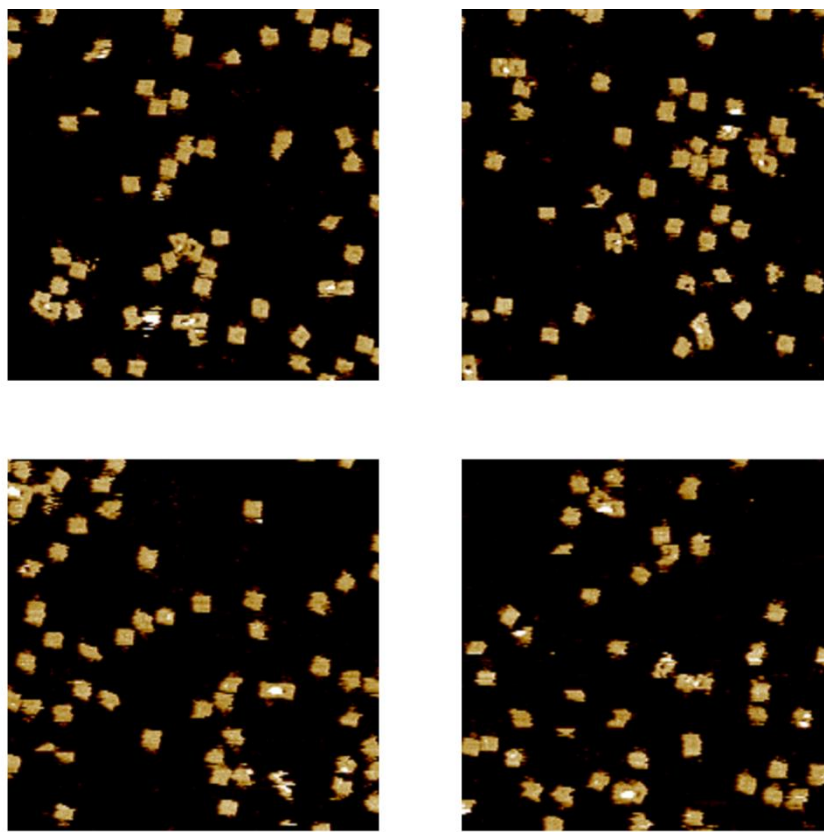

Figure S15. Four AFM images of the regenerated and locked ATP-responsive origami tiles upon the treatment of the unlocked cavity-containing ATP-responsive tiles with anti-helper strands ( $H_{1a}/H_{1b}'$  and  $H_{2a}/H_{2b}'$ ), C-ATP<sub>a</sub> and C-ATP<sub>a'</sub> (second cycle). Scale bar: 200 nm.

Table S12. Statistical analysis of the yields of the unlocked and locked origami tiles upon the treatment of the unlocked cavity-containing ATP-responsive origami tiles with anti-helper strands ( $H_{1a}'/H_{1b}'$  and  $H_{2a}'/H_{2b}'$ ), C-ATP<sub>a</sub> and C-ATP<sub>a'</sub> (second cycle).

| Statistical analysis |           | Unlocked | Locked | Incomplete structure |
|----------------------|-----------|----------|--------|----------------------|
| 1                    | Count     | 5        | 38     | 8                    |
|                      | Yield (%) | 9.8      | 74.5   |                      |
| 2                    | Count     | 4        | 30     | 9                    |
|                      | Yield (%) | 9.3      | 69.8   |                      |
| 3                    | Count     | 3        | 33     | 9                    |
|                      | Yield (%) | 6.7      | 73.3   |                      |
| 4                    | Count     | 3        | 33     | 10                   |
|                      | Yield (%) | 6.5      | 71.7   |                      |



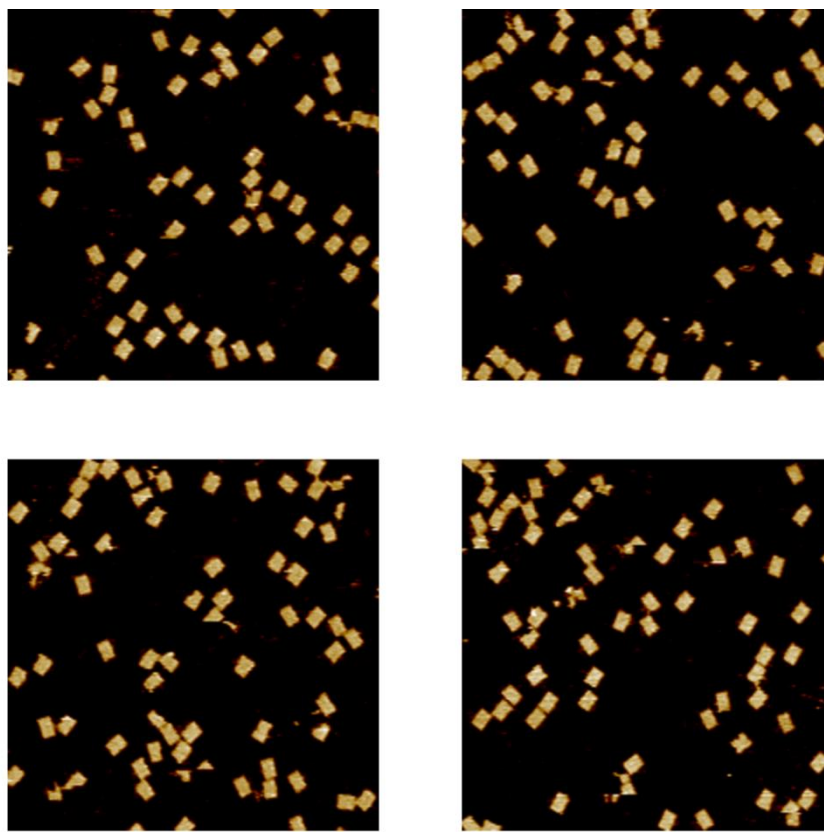

Figure S16. AFM images of the control experiment testing the unlocking of the ATP-responsive origami tiles in the presence of the helper hairpins  $H_1/H_2$  and in the absence of ATP. No tiles with nanoholes are observed, implying that the ATP is essential to unlock the origami tiles to yield the nanoholes. Scale bar: 200 nm.

Table S13. Statistical analysis of the yields of the unlocked and locked ATP-responsive origami tiles in the presence of the helper hairpins H<sub>1</sub>/H<sub>2</sub> and in the absence of ATP.

| Statistical analysis |           | Unlocked | Locked | Incomplete structure |
|----------------------|-----------|----------|--------|----------------------|
| 1                    | Count     | 0        | 48     | 3                    |
|                      | Yield (%) | 0        | 94.1   |                      |
| 2                    | Count     | 0        | 54     | 4                    |
|                      | Yield (%) | 0        | 93.1   |                      |
| 3                    | Count     | 0        | 54     | 6                    |
|                      | Yield (%) | 0        | 90.0   |                      |
| 4                    | Count     | 0        | 52     | 6                    |
|                      | Yield (%) | 0        | 89.7   |                      |

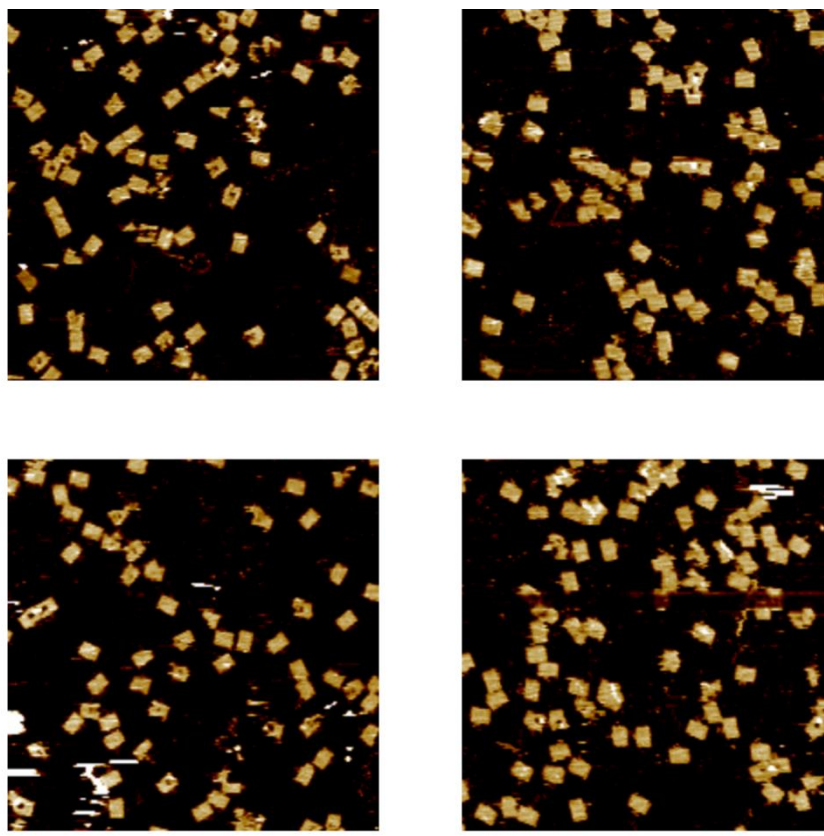

Figure S17. AFM images of the control experiment testing the ATP-driven unlocking of the origami tiles in the absence of the helper hairpins  $H_1/H_2$ . Only few origami tiles are with nanoholes. The results imply that the unlocked “window” exists in a flexible configuration that retains the nanohole closed without  $H_1/H_2$  that stretch the “window” to a rigid configuration by the hairpins/handles/anchor site units. Scale bar: 200 nm.

Table S14. Statistical analysis of the yields of the unlocked and locked ATP-responsive origami tiles in the presence of ATP and in the absence of the helper hairpins H<sub>1</sub>/H<sub>2</sub>.

| Statistical analysis |           | Unlocked | Locked | Incomplete structure |
|----------------------|-----------|----------|--------|----------------------|
| <b>1</b>             | Count     | 6        | 52     | 7                    |
|                      | Yield (%) | 9.2      | 80.0   |                      |
| <b>2</b>             | Count     | 6        | 60     | 3                    |
|                      | Yield (%) | 8.7      | 87.0   |                      |
| <b>3</b>             | Count     | 7        | 55     | 7                    |
|                      | Yield (%) | 10.1     | 79.7   |                      |
| <b>4</b>             | Count     | 5        | 56     | 5                    |
|                      | Yield (%) | 7.6      | 84.8   |                      |

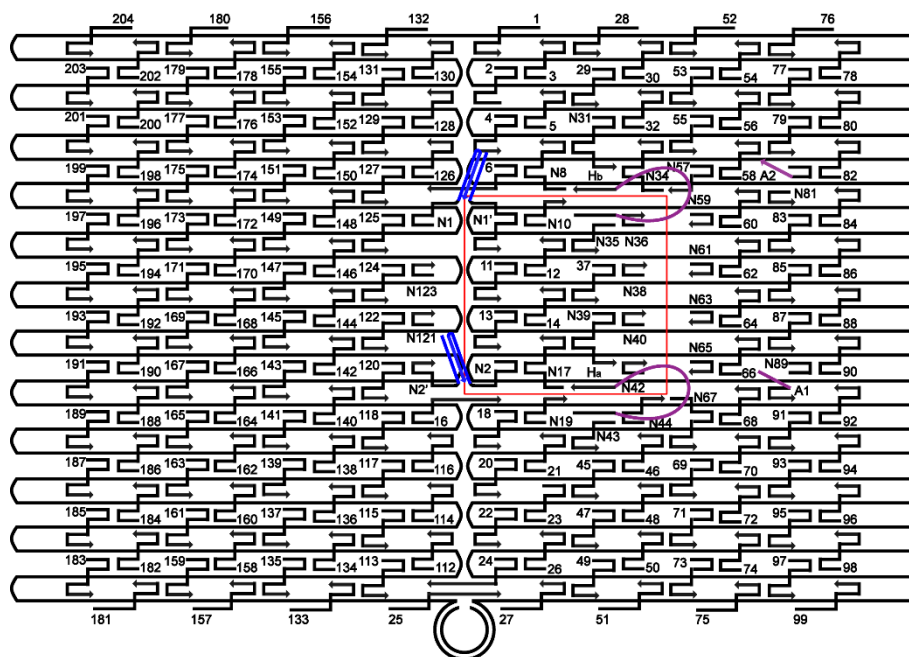

Figure S18. Schematic of the designed origami tile responsible to pH. The lock strands N1/N1' and N2/N2' shows in blue, the handles (Ha, Hb) are purple loops and the anchoring tethers (A1, A2) are short purple lines. The red square shows the designed “nano-cavity” patch in the origami tile. The lock strands can form the triplex structures at pH 6 and separate at pH 9.5.

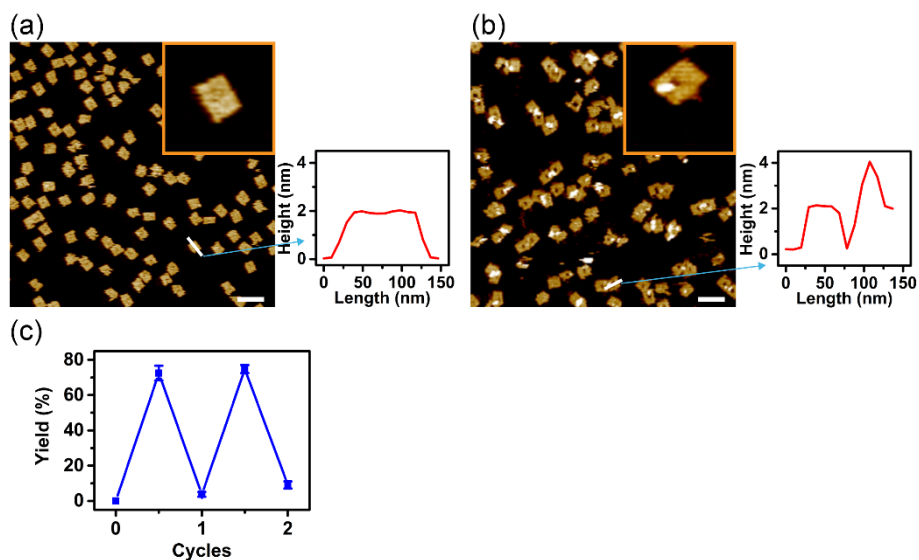

Figure S19. (a) AFM image of the T-A-T triplexes locked origami tiles and the corresponding cross-section analysis. Inset: Enlarged image of the T-A-T triplexes locked origami tile. Scale bar: 200 nm. (b) AFM image of the pH-driven unlocked nanocavity-containing origami tiles. Inset: Enlarged AFM image of the nanocavity containing origami raft. Scale bar: 200 nm. (c) Cyclic pH-triggered yields of the unlocked origami tiles generated at pH = 6.0 and pH = 9.5, respectively.

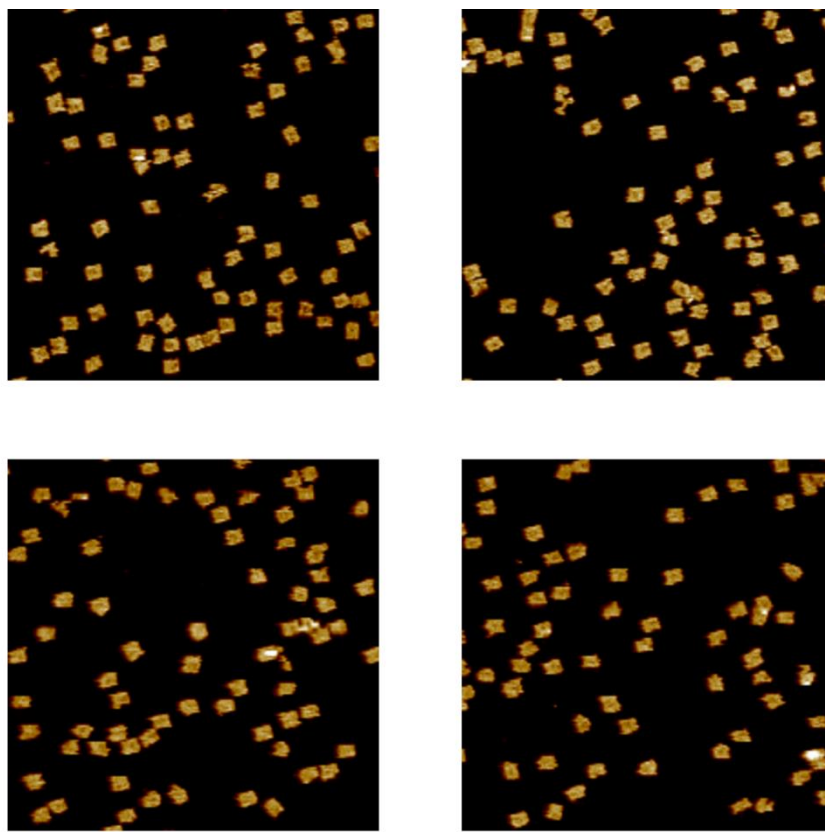

Figure S20. Four AFM images of the initial locked pH-responsive origami tiles before the treatment of the tiles at  $\text{pH} = 9.5$  with the helper hairpins  $\text{H}_1/\text{H}_2$ . Scale bar: 200 nm.

Table S15. Statistical analysis of the yields of the unlocked and locked pH-responsive origami tiles before the treatment of the tiles at pH = 9.5 with the helper hairpins H<sub>1</sub>/H<sub>2</sub>.

| Statistical analysis |           | Unlocked | Locked | Incomplete structure |
|----------------------|-----------|----------|--------|----------------------|
| 1                    | Count     | 0        | 66     | 3                    |
|                      | Yield (%) | 0        | 95.7   |                      |
| 2                    | Count     | 0        | 64     | 5                    |
|                      | Yield (%) | 0        | 92.8   |                      |
| 3                    | Count     | 0        | 58     | 3                    |
|                      | Yield (%) | 0        | 95.1   |                      |
| 4                    | Count     | 0        | 66     | 3                    |
|                      | Yield (%) | 0        | 95.7   |                      |



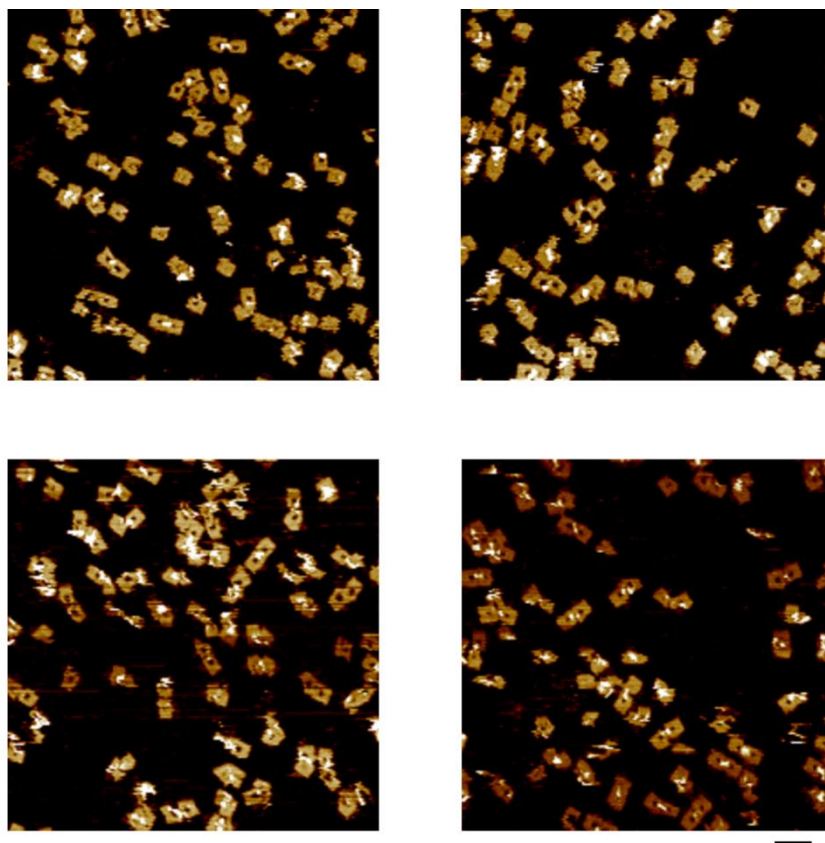

Figure S21. Four AFM images of the unlocked pH-responsive origami tiles upon the treatment of the tiles at  $\text{pH} = 9.5$  with the helper hairpins  $\text{H}_1/\text{H}_2$  (first cycle). Scale bar: 200 nm.

Table S16. Statistical analysis of the yields of the unlocked and locked pH-responsive origami tiles in the unlocked state after the treatment at pH = 9.5 with the helper hairpins H<sub>1</sub>/H<sub>2</sub> (first cycle).

| Statistical analysis |           | Unlocked | Locked | Incomplete structure |
|----------------------|-----------|----------|--------|----------------------|
| 1                    | Count     | 40       | 11     | 9                    |
|                      | Yield (%) | 66.7     | 18.3   |                      |
| 2                    | Count     | 49       | 10     | 6                    |
|                      | Yield (%) | 75.4     | 15.4   |                      |
| 3                    | Count     | 53       | 12     | 5                    |
|                      | Yield (%) | 75.7     | 17.1   |                      |
| 4                    | Count     | 52       | 13     | 7                    |
|                      | Yield (%) | 72.2     | 18.1   |                      |

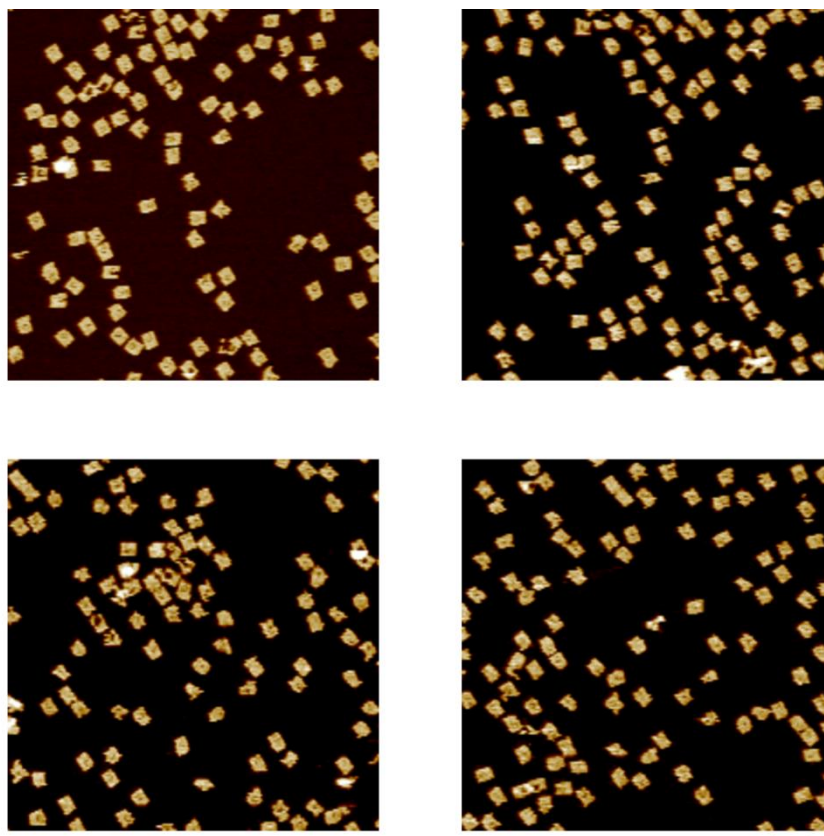

Figure S22. Four AFM images of the regenerated and locked origami tiles upon the treatment of the unlocked pH-responsive tiles with anti-helper strands ( $H_{1a}'/H_{1b}'$  and  $H_{2a}'/H_{2b}'$ ) at pH = 6 (first cycle). Scale bar: 200 nm.

Table S17. Statistical analysis of the yields of the unlocked and locked origami tiles upon the treatment of the unlocked pH-responsive tiles with anti-helper strands ( $H_{1a}/H_{1b}$ ' and  $H_{2a}/H_{2b}$ ') at pH = 6 (first cycle).

| Statistical analysis |           | Unlocked | Locked | Incomplete structure |
|----------------------|-----------|----------|--------|----------------------|
| 1                    | Count     | 3        | 82     | 5                    |
|                      | Yield (%) | 3.3      | 91.1   |                      |
| 2                    | Count     | 5        | 91     | 7                    |
|                      | Yield (%) | 4.9      | 88.3   |                      |
| 3                    | Count     | 2        | 92     | 7                    |
|                      | Yield (%) | 2.0      | 91.1   |                      |
| 4                    | Count     | 4        | 76     | 7                    |
|                      | Yield (%) | 4.6      | 87.4   |                      |

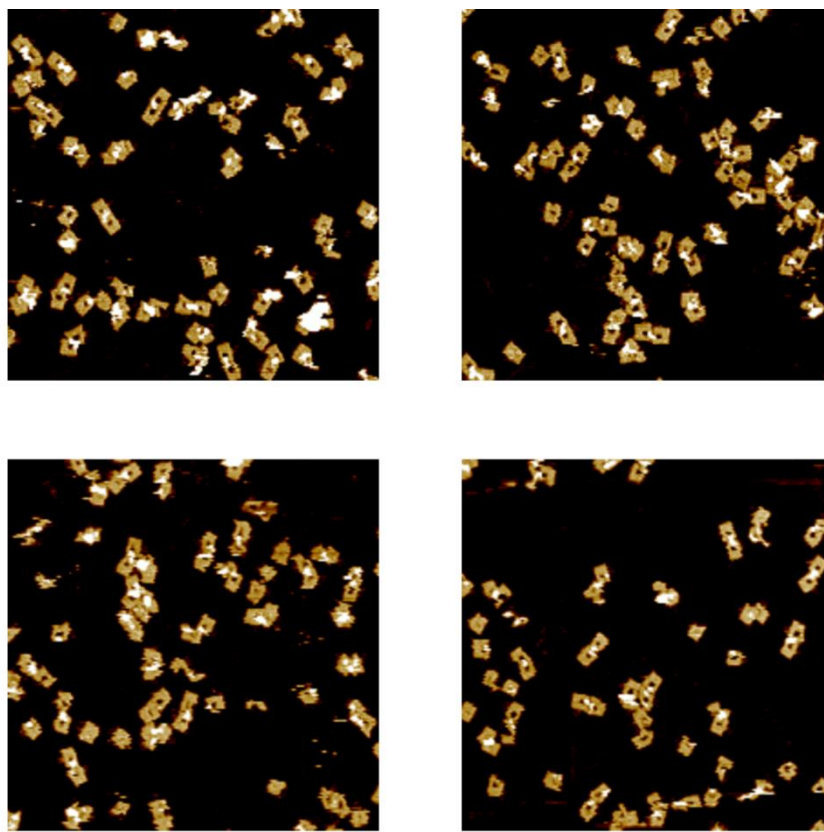

Figure S23. Four AFM images of the unlocked origami tiles upon the treatment of the pH-responsive tiles at  $\text{pH} = 9.5$  with the helper hairpins  $\text{H}_1/\text{H}_2$  (second cycle). Scale bar: 200 nm.

Table S18. Statistical analysis of the yields of the unlocked and locked origami tiles upon the treatment of the pH-responsive tiles at pH = 9.5 with the helper hairpins H<sub>1</sub>/H<sub>2</sub> (second cycle).

| Statistical analysis |           | Unlocked | Locked | Incomplete structure |
|----------------------|-----------|----------|--------|----------------------|
| 1                    | Count     | 40       | 8      | 4                    |
|                      | Yield (%) | 76.9     | 15.4   |                      |
| 2                    | Count     | 44       | 10     | 4                    |
|                      | Yield (%) | 75.9     | 17.2   |                      |
| 3                    | Count     | 38       | 9      | 6                    |
|                      | Yield (%) | 71.7     | 17.0   |                      |
| 4                    | Count     | 38       | 10     | 3                    |
|                      | Yield (%) | 74.5     | 19.6   |                      |

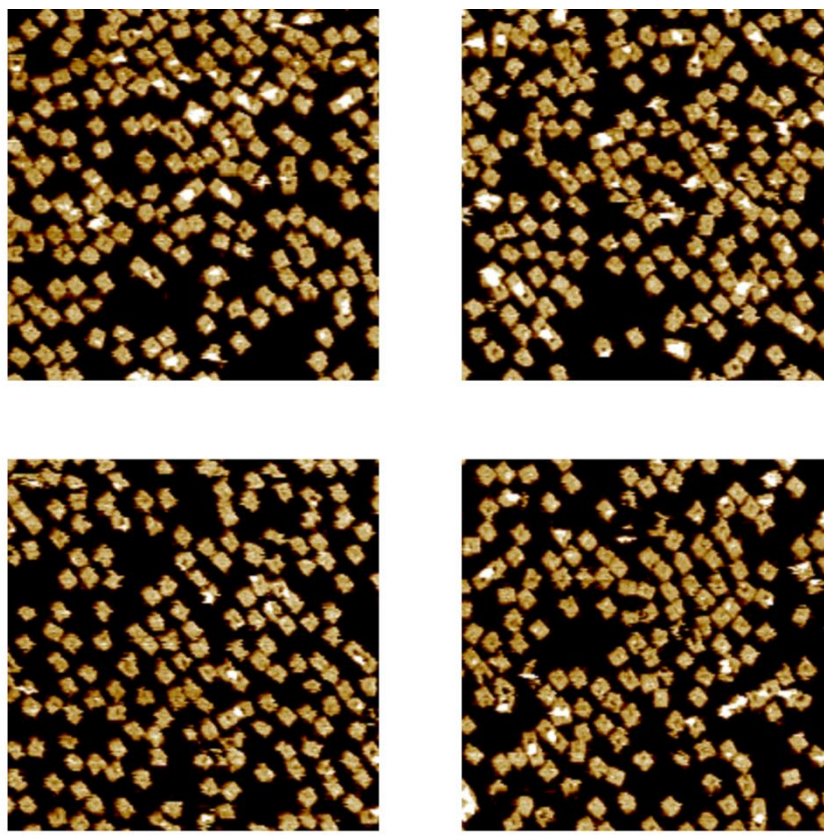

Figure S24. Four AFM images of the regenerated and locked pH-responsive origami tiles, upon the treatment of the unlocked tiles with anti-helper strands ( $H_{1a}'/H_{1b}'$  and  $H_{2a}'/H_{2b}'$ ) at pH = 6 (second cycle). Scale bar: 200 nm.

Table S19. Statistical analysis of the yields of the unlocked and locked origami tiles upon the treatment of the unlocked pH-responsive tiles with anti-helper strands ( $H_{1a}'/H_{1b}'$  and  $H_{2a}'/H_{2b}'$ ) at pH = 6 (second cycle).

| Statistical analysis |           | Unlocked | Locked | Incomplete structure |
|----------------------|-----------|----------|--------|----------------------|
| 1                    | Count     | 12       | 136    | 21                   |
|                      | Yield (%) | 7.1      | 80.5   |                      |
| 2                    | Count     | 19       | 120    | 20                   |
|                      | Yield (%) | 11.9     | 75.5   |                      |
| 3                    | Count     | 14       | 119    | 21                   |
|                      | Yield (%) | 9.1      | 77.3   |                      |
| 4                    | Count     | 13       | 125    | 20                   |
|                      | Yield (%) | 8.2      | 79.1   |                      |



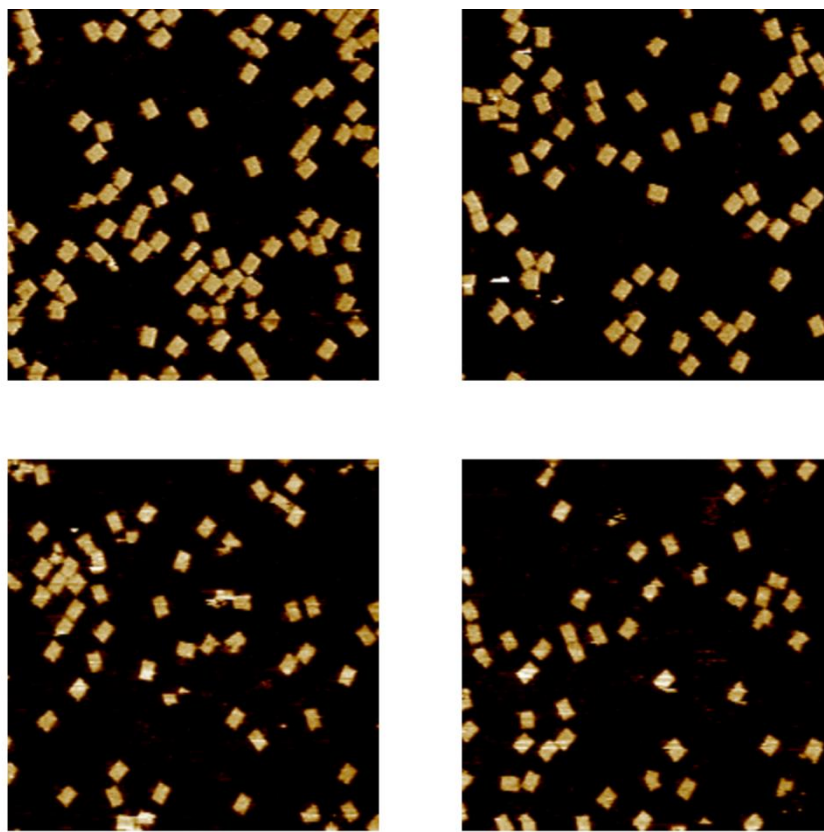

Figure S25. AFM images of the control experiment testing the unlocking of the pH-responsive origami tiles in the presence of the helper hairpins H<sub>1</sub>/H<sub>2</sub> at pH = 6. No tiles with nanoholes are observed, implying that the pH = 9.5 is essential to unlock the origami tiles to yield the nanoholes. Scale bar: 200 nm.

Table S20. Statistical analysis of the yields of the unlocked and locked pH-responsive origami tiles in the presence of the helper hairpins H<sub>1</sub>/H<sub>2</sub> at pH = 6.

| Statistical analysis |           | Unlocked | Locked | Incomplete structure |
|----------------------|-----------|----------|--------|----------------------|
| 1                    | Count     | 0        | 46     | 2                    |
|                      | Yield (%) | 0        | 95.8   |                      |
| 2                    | Count     | 0        | 50     | 5                    |
|                      | Yield (%) | 0        | 90.9   |                      |
| 3                    | Count     | 0        | 77     | 5                    |
|                      | Yield (%) | 0        | 93.9   |                      |
| 4                    | Count     | 0        | 62     | 1                    |
|                      | Yield (%) | 0        | 98.4   |                      |

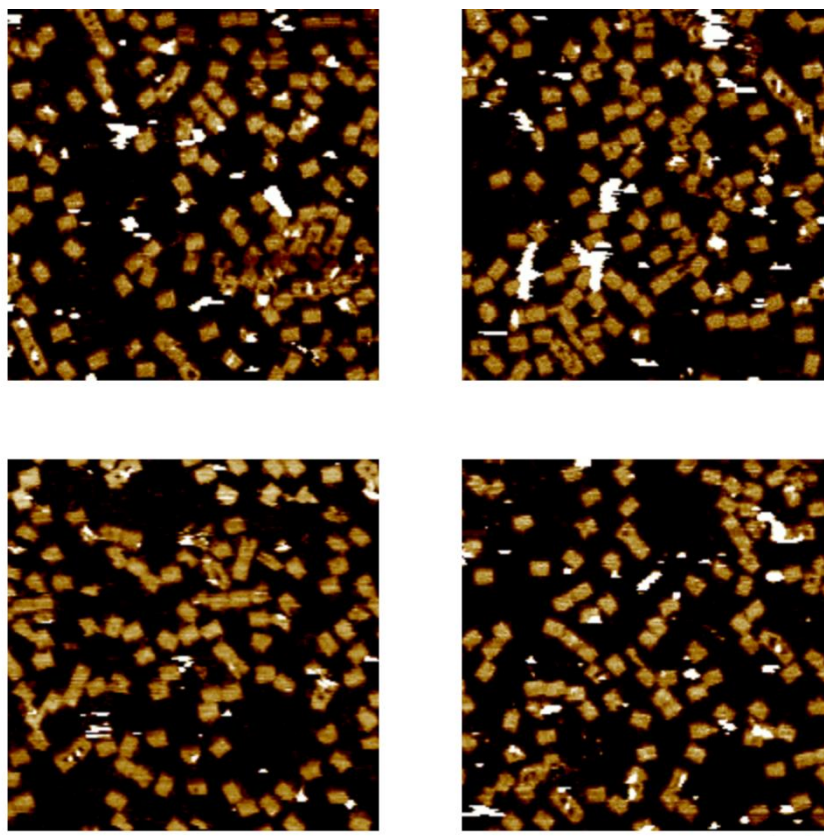

Figure S26. AFM images of the control experiment testing the pH-driven unlocking of the pH-responsive origami tiles in the absence of the helper hairpins  $H_1/H_2$ . Only few origami tiles are with nanoholes. The results imply that the unlocked “window” exists in a flexible configuration that retains the nanohole closed without  $H_1/H_2$  that stretch the “window” to a rigid configuration by the hairpins/handles/anchor site units. Scale bar: 200 nm.

Table S21. Statistical analysis of the yields of the unlocked and locked pH-responsive origami tiles at pH = 9.5 and in the absence of the helper hairpins H<sub>1</sub>/H<sub>2</sub>.

| Statistical analysis |           | Unlocked | Locked | Incomplete structure |
|----------------------|-----------|----------|--------|----------------------|
| 1                    | Count     | 11       | 98     | 4                    |
|                      | Yield (%) | 9.7      | 86.7   |                      |
| 2                    | Count     | 11       | 99     | 10                   |
|                      | Yield (%) | 9.2      | 82.5   |                      |
| 3                    | Count     | 10       | 93     | 8                    |
|                      | Yield (%) | 9.0      | 83.8   |                      |
| 4                    | Count     | 9        | 92     | 6                    |
|                      | Yield (%) | 8.4      | 86.0   |                      |

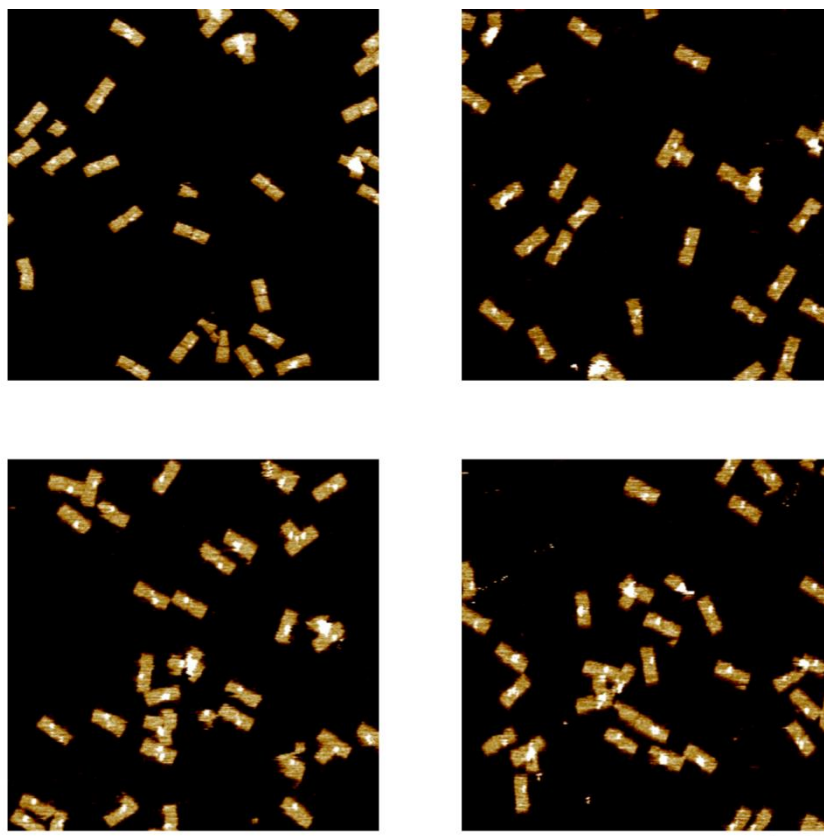

Figure S27. Four AFM images of the initial locked ATP-/K<sup>+</sup>-ion-responsive origami dimers (state I) before the treatment with K<sup>+</sup> ions or ATP and the helper hairpins H<sub>1</sub>/H<sub>2</sub>. Scale bar: 200 nm.

Table S22. Statistical analysis of the yields of the unlocked and locked ATP-/K<sup>+</sup>-ion-responsive origami dimers (state I) before the treatment with K<sup>+</sup> ions or ATP and the helper hairpins H<sub>1</sub>/H<sub>2</sub>.

| Statistical analysis |           | Dimer |     |     |      | Monomer |     |     |     | Incomplete structures |
|----------------------|-----------|-------|-----|-----|------|---------|-----|-----|-----|-----------------------|
|                      |           | O/O   | O/C | C/O | C/C  | L-O     | L-C | R-O | R-C |                       |
| 1                    | Count     | 0     | 0   | 0   | 20   | 0       | 2   | 0   | 2   | 4                     |
|                      | Yield (%) | 0     | 0   | 0   | 83.3 |         |     |     |     |                       |
| 2                    | Count     | 0     | 0   | 0   | 19   | 0       | 2   | 0   | 2   | 4                     |
|                      | Yield (%) | 0     | 0   | 0   | 82.6 |         |     |     |     |                       |
| 3                    | Count     | 0     | 0   | 0   | 23   | 0       | 3   | 0   | 3   | 4                     |
|                      | Yield (%) | 0     | 0   | 0   | 82.1 |         |     |     |     |                       |
| 4                    | Count     | 0     | 0   | 0   | 25   | 0       | 2   | 0   | 2   | 4                     |
|                      | Yield (%) | 0     | 0   | 0   | 86.2 |         |     |     |     |                       |

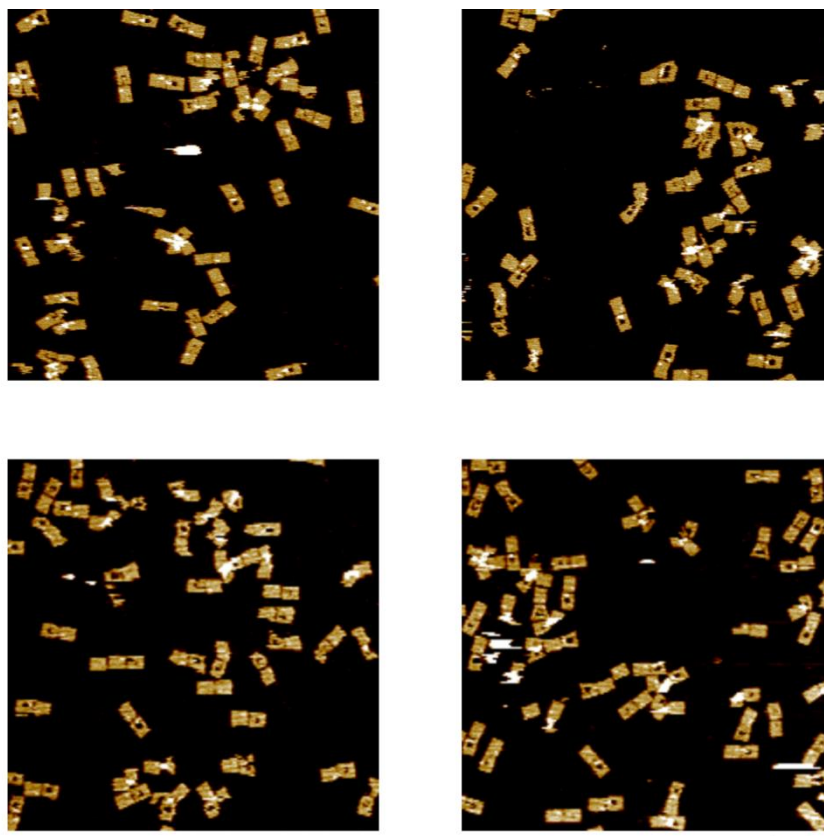

Figure S28. Four AFM images of the ATP-/K<sup>+</sup>-ion-responsive origami dimers with unlocked nanocavity on the unmarked tile (state II) upon the treatment with ATP and the helper hairpins H<sub>1</sub>/H<sub>2</sub>. Scale bar: 200 nm.

Table S23. Statistical analysis of the yields of the unlocked and locked ATP-/K<sup>+</sup>-ion-responsive origami dimers (state II) upon the treatment with ATP and the helper hairpins H<sub>1</sub>/H<sub>2</sub>.

| Statistical analysis |           | Dimer |      |     |      | Monomer |     |     |     | Incomplete structures |
|----------------------|-----------|-------|------|-----|------|---------|-----|-----|-----|-----------------------|
|                      |           | O/O   | O/C  | C/O | C/C  | L-O     | L-C | R-O | R-C |                       |
| 1                    | Count     | 0     | 22   | 0   | 10   | 1       | 1   | 0   | 3   | 5                     |
|                      | Yield (%) | 0     | 59.5 | 0   | 27.0 |         |     |     |     |                       |
| 2                    | Count     | 0     | 19   | 0   | 2    | 1       | 1   | 0   | 2   | 12                    |
|                      | Yield (%) | 0     | 65.5 | 0   | 6.9  |         |     |     |     |                       |
| 3                    | Count     | 0     | 28   | 0   | 6    | 2       | 4   | 0   | 6   | 8                     |
|                      | Yield (%) | 0     | 63.6 | 0   | 13.6 |         |     |     |     |                       |
| 4                    | Count     | 0     | 26   | 0   | 6    | 1       | 0   | 0   | 1   | 10                    |
|                      | Yield (%) | 0     | 68.4 | 0   | 15.8 |         |     |     |     |                       |



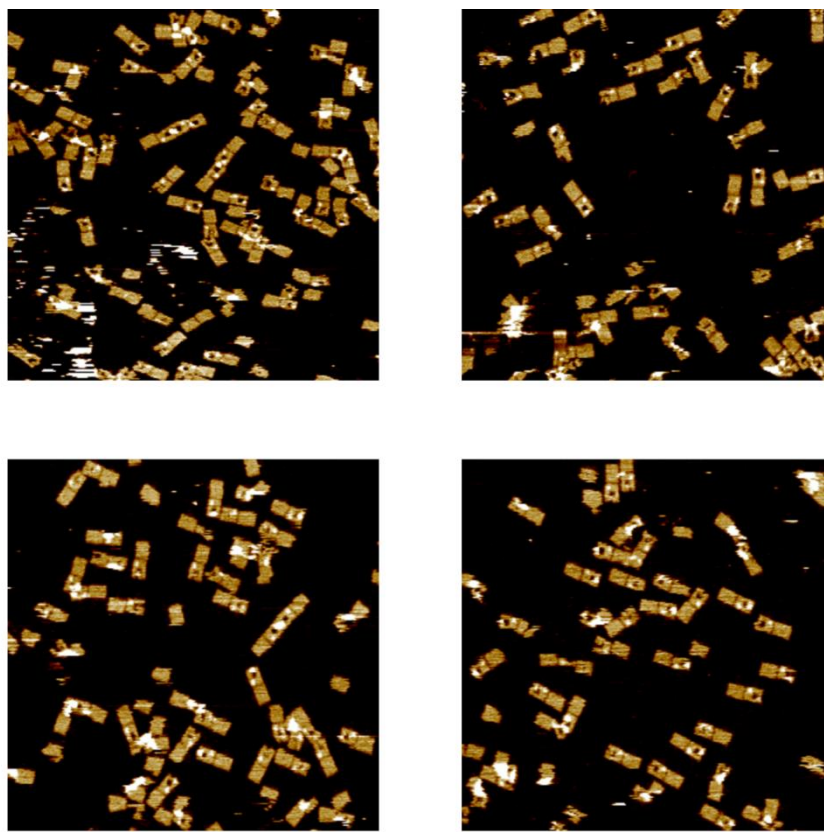

Figure S29. Four AFM images of the ATP-/K<sup>+</sup>-ion-responsive origami dimers with unlocked nanocavity on the marked tile (state III) upon the treatment with K<sup>+</sup> ions and the helper hairpins H<sub>1</sub>/H<sub>2</sub>. Scale bar: 200 nm.

Table S24. Statistical analysis of the yields of the unlocked and locked ATP-/K<sup>+</sup>-ion-responsive origami dimers (state III) upon the treatment with K<sup>+</sup> ions and the helper hairpins H<sub>1</sub>/H<sub>2</sub>.

| Statistical analysis |           | Dimer |     |      |      | Monomer |     |     |     | Incomplete structures |
|----------------------|-----------|-------|-----|------|------|---------|-----|-----|-----|-----------------------|
|                      |           | O/O   | O/C | C/O  | C/C  | L-O     | L-C | R-O | R-C |                       |
| 1                    | Count     | 0     | 0   | 35   | 8    | 1       | 5   | 4   | 2   | 2                     |
|                      | Yield (%) | 0     | 0   | 70.0 | 16.0 |         |     |     |     |                       |
| 2                    | Count     | 0     | 0   | 20   | 6    | 1       | 3   | 3   | 0   | 9                     |
|                      | Yield (%) | 0     | 0   | 58.8 | 17.6 |         |     |     |     |                       |
| 3                    | Count     | 0     | 0   | 25   | 3    | 1       | 3   | 2   | 2   | 8                     |
|                      | Yield (%) | 0     | 0   | 69.4 | 8.3  |         |     |     |     |                       |
| 4                    | Count     | 0     | 1   | 28   | 5    | 0       | 6   | 2   | 3   | 5                     |
|                      | Yield (%) | 0     | 2.4 | 66.7 | 11.9 |         |     |     |     |                       |

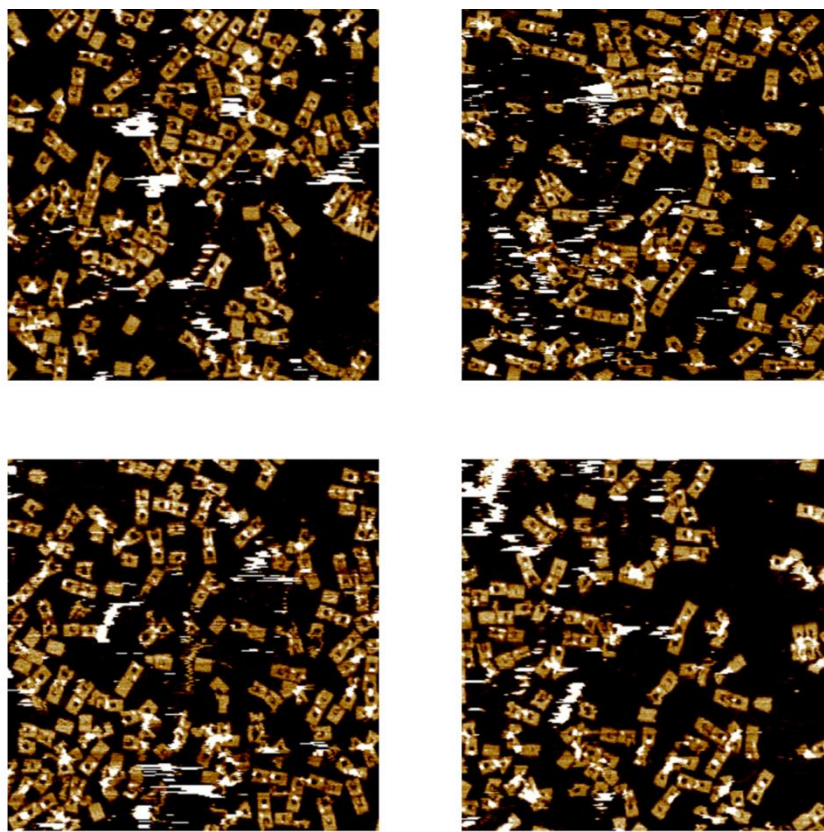

Figure S30. Four AFM images of the ATP-/K<sup>+</sup>-ion-responsive origami dimers with unlocked nanocavities on both tiles (state IV) upon the treatment with K<sup>+</sup> ions/ATP and the helper hairpins H<sub>1</sub>/H<sub>2</sub>. Scale bar: 200 nm.

Table S25. Statistical analysis of the yields of the unlocked and locked ATP-/K<sup>+</sup>-ion-responsive origami dimers (state IV) upon the treatment with K<sup>+</sup> ions/ATP and the helper hairpins H<sub>1</sub>/H<sub>2</sub>.

| Statistical analysis |           | Dimer |     |     |     | Monomer |     |     |     | Incomplete structures |
|----------------------|-----------|-------|-----|-----|-----|---------|-----|-----|-----|-----------------------|
|                      |           | O/O   | O/C | C/O | C/C | L-O     | L-C | R-O | R-C |                       |
| 1                    | Count     | 35    | 3   | 3   | 3   | 12      | 9   | 7   | 2   | 30                    |
|                      | Yield (%) | 47.3  | 4.1 | 4.1 | 4.1 |         |     |     |     |                       |
| 2                    | Count     | 29    | 4   | 5   | 2   | 8       | 5   | 4   | 3   | 20                    |
|                      | Yield (%) | 48.3  | 6.7 | 8.3 | 3.3 |         |     |     |     |                       |
| 3                    | Count     | 42    | 5   | 7   | 2   | 8       | 6   | 5   | 4   | 33                    |
|                      | Yield (%) | 50.0  | 6.0 | 8.3 | 2.4 |         |     |     |     |                       |
| 4                    | Count     | 37    | 4   | 4   | 4   | 13      | 7   | 4   | 2   | 28                    |
|                      | Yield (%) | 48.7  | 5.3 | 5.3 | 5.3 |         |     |     |     |                       |

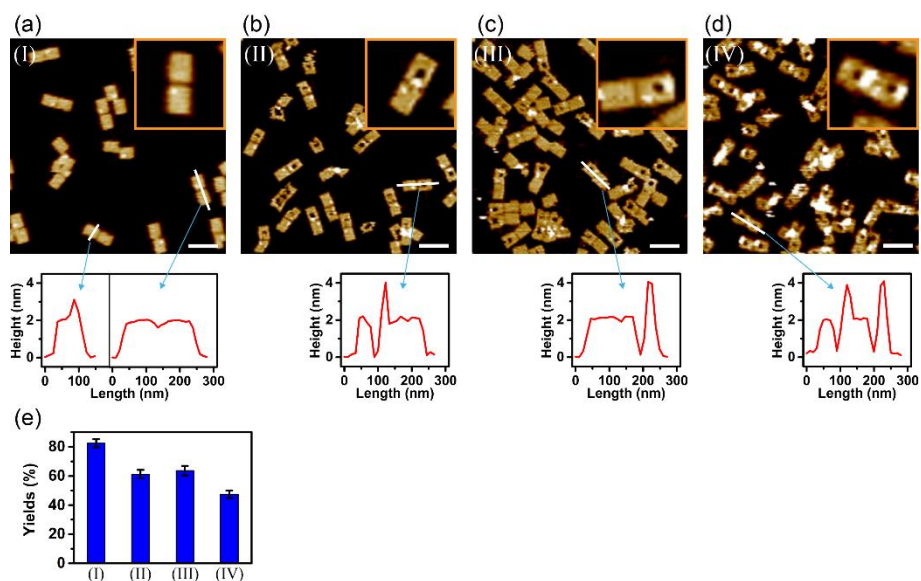

Figure S31. The AFM images and respective cross-section analyses of the dimers are presented in: (a) The locked dimer, configuration I, (b) Configuration II, (c) Configuration III, (d) Configuration IV. (a)-(d), Scale bars: 200 nm. (e) Yields of origami structures corresponding to the closed dimer I and to the nanocavity-containing origami structures II, III and IV generated by the respective triggers.

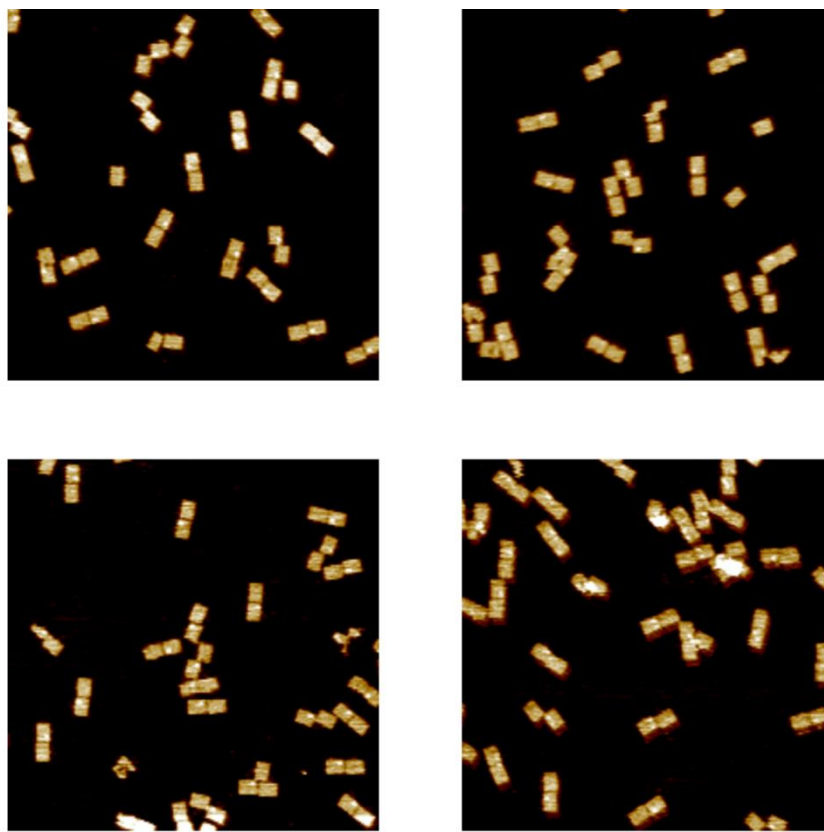

Figure S32. Four AFM images of the pH-/K<sup>+</sup>-ion-responsive origami dimers (state I) before the treatment with K<sup>+</sup> ions or pH 9.5 buffer and the helper hairpins H<sub>1</sub>/H<sub>2</sub>. Scale bar: 200 nm.

Table S26. Statistical analysis of the yields of the unlocked and locked pH-/K<sup>+</sup>-ion-responsive origami dimers (state I) before the treatment with K<sup>+</sup> ions or pH 9.5 buffer and the helper hairpins H<sub>1</sub>/H<sub>2</sub>.

| Statistical analysis |           | Dimer |     |     |      | Monomer |     |     |     | Incomplete structures |
|----------------------|-----------|-------|-----|-----|------|---------|-----|-----|-----|-----------------------|
|                      |           | O/O   | O/C | C/O | C/C  | L-O     | L-C | R-O | R-C |                       |
| 1                    | Count     | 0     | 0   | 0   | 18   | 0       | 3   | 0   | 3   | 2                     |
|                      | Yield (%) | 0     | 0   | 0   | 81.8 |         |     |     |     |                       |
| 2                    | Count     | 0     | 0   | 0   | 19   | 0       | 3   | 0   | 2   | 1                     |
|                      | Yield (%) | 0     | 0   | 0   | 86.4 |         |     |     |     |                       |
| 3                    | Count     | 0     | 0   | 0   | 16   | 0       | 4   | 0   | 4   | 0                     |
|                      | Yield (%) | 0     | 0   | 0   | 80.0 |         |     |     |     |                       |
| 4                    | Count     | 0     | 0   | 0   | 22   | 0       | 4   | 0   | 5   | 1                     |
|                      | Yield (%) | 0     | 0   | 0   | 81.5 |         |     |     |     |                       |

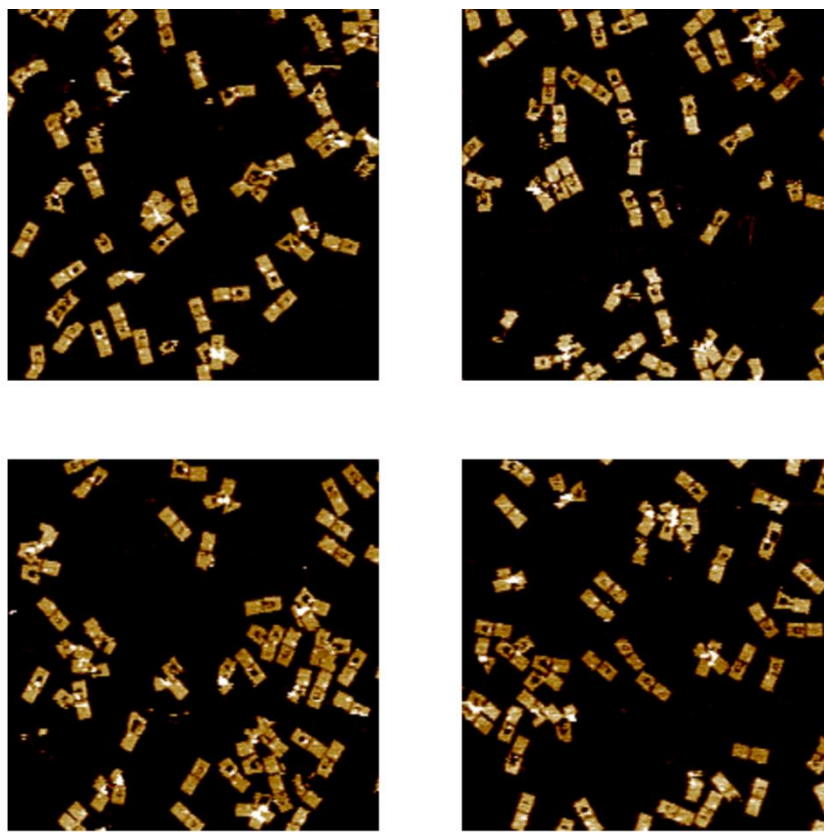

Figure S33. Four AFM images of the pH-/K<sup>+</sup>-ion-responsive origami dimers with unlocked nanocavity on the unmarked tile (state II) upon the treatment of the dimers at pH 9.5 buffer and the helper hairpins H<sub>1</sub>/H<sub>2</sub>. Scale bar: 200 nm.



Table S27. Statistical analysis of the yields of the unlocked and locked pH-/K<sup>+</sup>-ion-responsive origami dimers (state II) upon the treatment in pH 9.5 buffer and the helper hairpins H<sub>1</sub>/H<sub>2</sub>.

| Statistical analysis |           | Dimer |      |     |      | Monomer |     |     |     | Incomplete structures |
|----------------------|-----------|-------|------|-----|------|---------|-----|-----|-----|-----------------------|
|                      |           | O/O   | O/C  | C/O | C/C  | L-O     | L-C | R-O | R-C |                       |
| 1                    | Count     | 0     | 25   | 0   | 5    | 5       | 4   | 0   | 5   | 6                     |
|                      | Yield (%) | 0     | 62.5 | 0   | 12.5 |         |     |     |     |                       |
| 2                    | Count     | 0     | 22   | 0   | 5    | 5       | 4   | 0   | 5   | 6                     |
|                      | Yield (%) | 0     | 59.5 | 0   | 13.5 |         |     |     |     |                       |
| 3                    | Count     | 0     | 21   | 0   | 4    | 4       | 4   | 0   | 7   | 7                     |
|                      | Yield (%) | 0     | 58.3 | 0   | 11.1 |         |     |     |     |                       |
| 4                    | Count     | 0     | 22   | 0   | 5    | 4       | 3   | 0   | 4   | 3                     |
|                      | Yield (%) | 0     | 64.7 | 0   | 14.7 |         |     |     |     |                       |

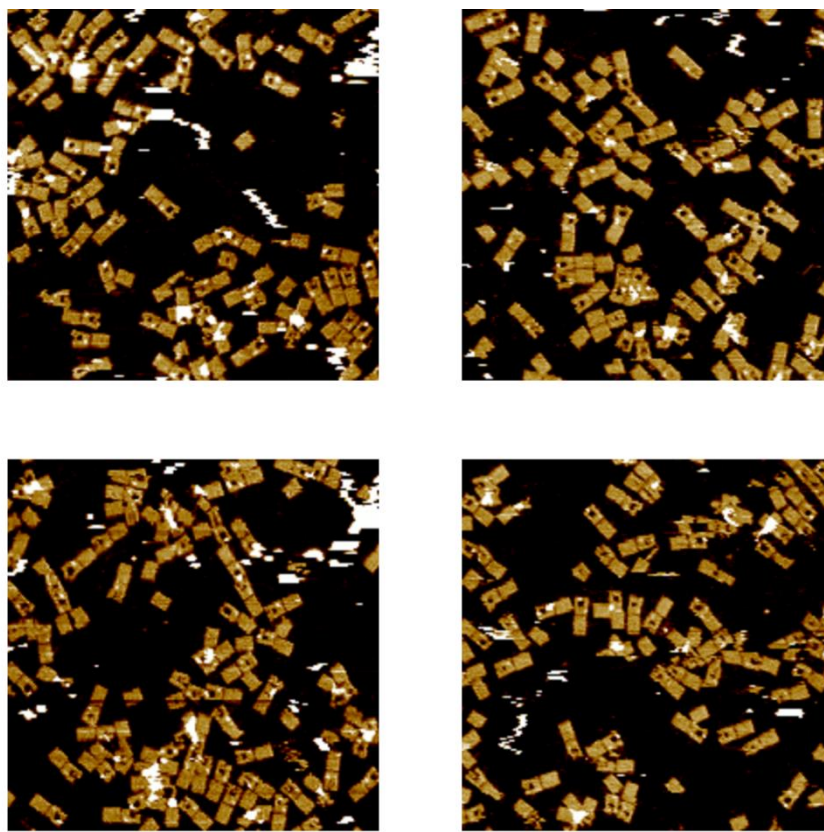

Figure S34. Four AFM images of the pH-/K<sup>+</sup>-ion-responsive origami dimers with unlocked nanocavity on the marked tile (state III) upon the treatment with K<sup>+</sup> ions and the helper hairpins H<sub>1</sub>/H<sub>2</sub>. Scale bar: 200 nm.

Table S28. Statistical analysis of the yields of the unlocked and locked pH-/K<sup>+</sup>-ion-responsive origami dimers (state III) upon the treatment with K<sup>+</sup> ions and the helper hairpins H<sub>1</sub>/H<sub>2</sub>.

| Statistical analysis |           | Dimer |     |      |      | Monomer |     |     |     | Incomplete structures |
|----------------------|-----------|-------|-----|------|------|---------|-----|-----|-----|-----------------------|
|                      |           | O/O   | O/C | C/O  | C/C  | L-O     | L-C | R-O | R-C |                       |
| 1                    | Count     | 0     | 1   | 31   | 12   | 0       | 8   | 1   | 5   | 4                     |
|                      | Yield (%) | 0     | 1.9 | 58.5 | 22.6 |         |     |     |     |                       |
| 2                    | Count     | 0     | 0   | 36   | 9    | 1       | 9   | 3   | 4   | 5                     |
|                      | Yield (%) | 0     | 0   | 64.3 | 16.1 |         |     |     |     |                       |
| 3                    | Count     | 0     | 1   | 38   | 5    | 0       | 12  | 9   | 6   | 11                    |
|                      | Yield (%) | 0     | 1.6 | 60.3 | 7.9  |         |     |     |     |                       |
| 4                    | Count     | 0     | 0   | 36   | 4    | 1       | 9   | 5   | 4   | 7                     |
|                      | Yield (%) | 0     | 0   | 67.9 | 7.5  |         |     |     |     |                       |

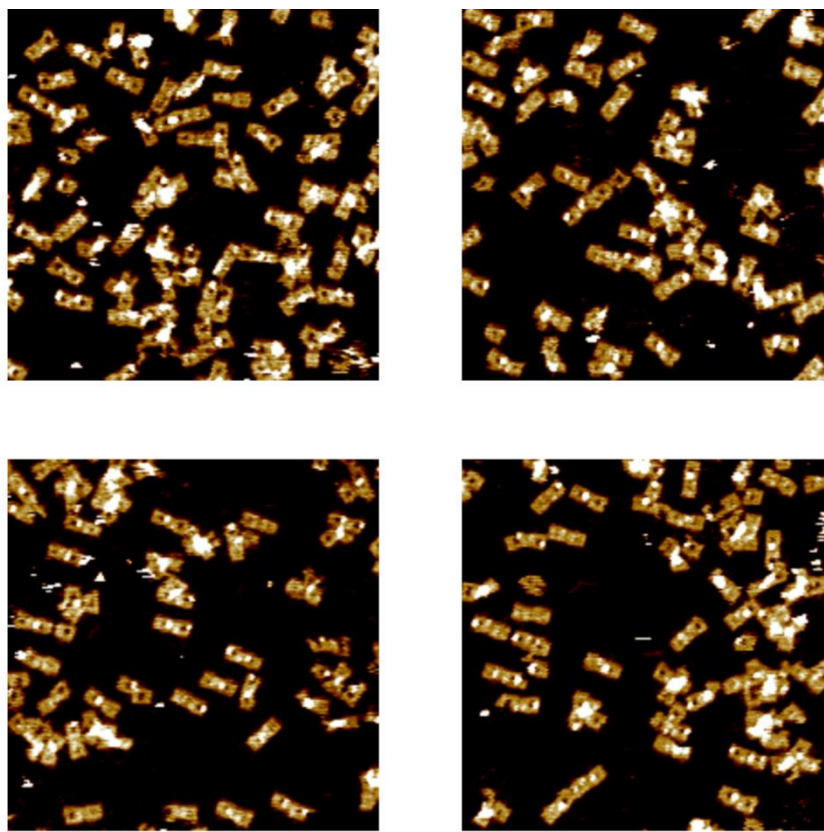

Figure S35. Four AFM images of the pH-/K<sup>+</sup>-ion-responsive origami dimers with unlocked nanocavities on both tiles (state IV) upon the treatment with K<sup>+</sup> ions and the helper hairpins H<sub>1</sub>/H<sub>2</sub> at pH 9.5. Scale bar: 200 nm.

Table S29. Statistical analysis of the yields of the unlocked and locked pH-/K<sup>+</sup>-ion-responsive origami dimers (state IV) upon the treatment with K<sup>+</sup> ions and the helper hairpins H<sub>1</sub>/H<sub>2</sub> at pH 9.5.

| Statistical analysis |           | Dimer |      |      |      | Monomer |     |     |     | Incomplete structures |
|----------------------|-----------|-------|------|------|------|---------|-----|-----|-----|-----------------------|
|                      |           | O/O   | O/C  | C/O  | C/C  | L-O     | L-C | R-O | R-C |                       |
| 1                    | Count     | 14    | 4    | 3    | 2    | 2       | 2   | 3   | 1   | 8                     |
|                      | Yield (%) | 45.2  | 12.9 | 9.7  | 6.5  |         |     |     |     |                       |
| 2                    | Count     | 23    | 3    | 3    | 6    | 5       | 3   | 5   | 3   | 6                     |
|                      | Yield (%) | 50.0  | 6.5  | 6.5  | 13.0 |         |     |     |     |                       |
| 3                    | Count     | 17    | 3    | 4    | 3    | 3       | 3   | 3   | 3   | 4                     |
|                      | Yield (%) | 48.6  | 8.6  | 11.4 | 8.6  |         |     |     |     |                       |
| 4                    | Count     | 16    | 3    | 2    | 3    | 4       | 4   | 3   | 2   | 7                     |
|                      | Yield (%) | 47.1  | 8.8  | 5.9  | 8.8  |         |     |     |     |                       |

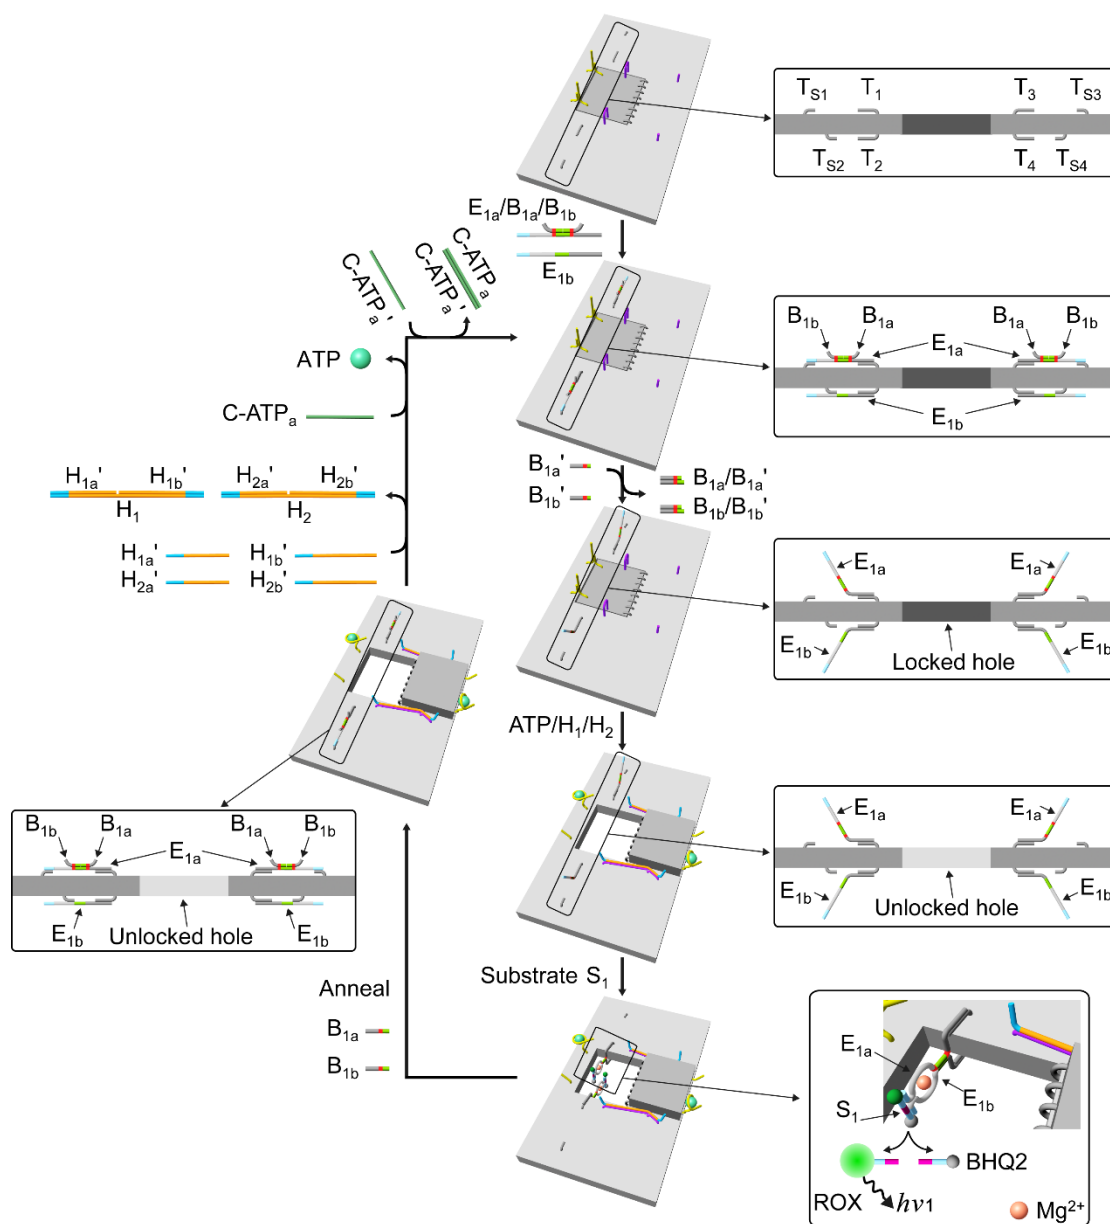

Figure S36. Schematic of engineering of the origami tile (only showing the core part of the tile) and the switchable catalysis of the  $Mg^{2+}$ -ion-dependent DNAzyme in the nanocavity. The tile includes the ATP-driven unlocking apparatus (discussed in Fig. 3 and text). Protruding tethers  $T_1/T_3$  and  $T_2/T_4$  are designed on the opposite sides of the origami tile. The duplex  $E_{1a}/B_{1a}/B_{1b}$  and the strand  $E_{1b}$  are hybridized with the tethers  $T_1/T_3$  and  $T_2/T_4$ , respectively. Prior to the unlocking of the tile,  $E_{1a}/B_{1a}/B_{1b}$  are unblocked by the strand displacement process, using appropriate anti-blockers ( $B_{1a}'/B_{1b}'$ ). The deblocked strand  $E_{1a}$  and strand  $E_{1b}$  correspond to the  $Mg^{2+}$ -ion-dependent DNAzyme subunits. The ATP induced unlocking of the origami tile, in the presence of the helper hairpins  $H_1$  and  $H_2$  leads to the formation of the nanocavity. The strands  $E_{1a}$  and  $E_{1b}$  bind together and form the active  $Mg^{2+}$ -ion-dependent DNAzyme that cleave the ROX/BHQ2-modified substrate  $S_1$  to produce the ROX-modified fragment in the confined nanocavity. Treatment of the catalytic system with the blockers  $B_{1a}$  and  $B_{1b}$  separates the  $Mg^{2+}$ -ion-dependent DNAzyme subunits, and the

subsequent treatment of the tiles with C-ATP<sub>a</sub> and C-ATP<sub>a</sub>'<sub>1</sub>, in the presence of the respective counter-helper units (H<sub>1a</sub>'/H<sub>1b</sub>'/H<sub>2a</sub>'/H<sub>2b</sub>'<sub>1</sub>), leads to the closure of the nanocavity. The scheme represents the mechanistic path for the cyclic switching of the activity of the Mg<sup>2+</sup>-ion-dependent DNAzyme in the confined nanocavity, associated with the origami tile. The reversible switching of the fluorescence of ROX provides the readout signal for the “ON”/“OFF” switching of the catalytic functions of the system.

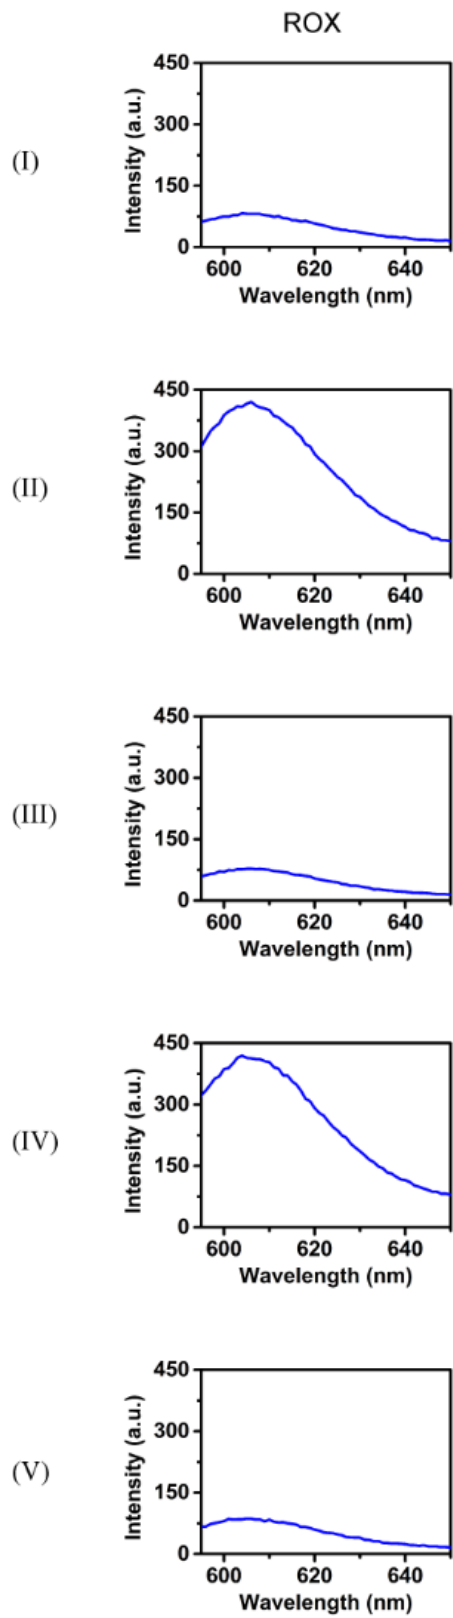

Figure S37. Fluorescence spectra corresponding to the cyclic activation and deactivation of the  $Mg^{2+}$ -ion-dependent DNAzyme in the ATP-responsive origami tiles. Panel I corresponds to the fluorescence response of the locked ATP-responsive origami tile. Panel II corresponds to the activated DNAzyme in the nanocavities as a result of the ATP,  $H_1/H_2$ -stimulated unlocking of the cavities. Panel III to Panel V represent the



fluorescence spectra of the system upon the cyclic closure-opening and reclosure of the nanocavities, The closed ATP-responsive origami tiles are generated by treatment of the open ATP-responsive origami tiles with the counter strands  $H_{1a}'$  and  $H_{1b}'$ ,  $H_{2a}'$  and  $H_{2b}'$ , C-ATP<sub>a</sub> and C-ATP<sub>a</sub>'. The re-opening of the ATP-responsive tiles involved the treatment of the closed state with ATP and the hairpins  $H_1/H_2$ .

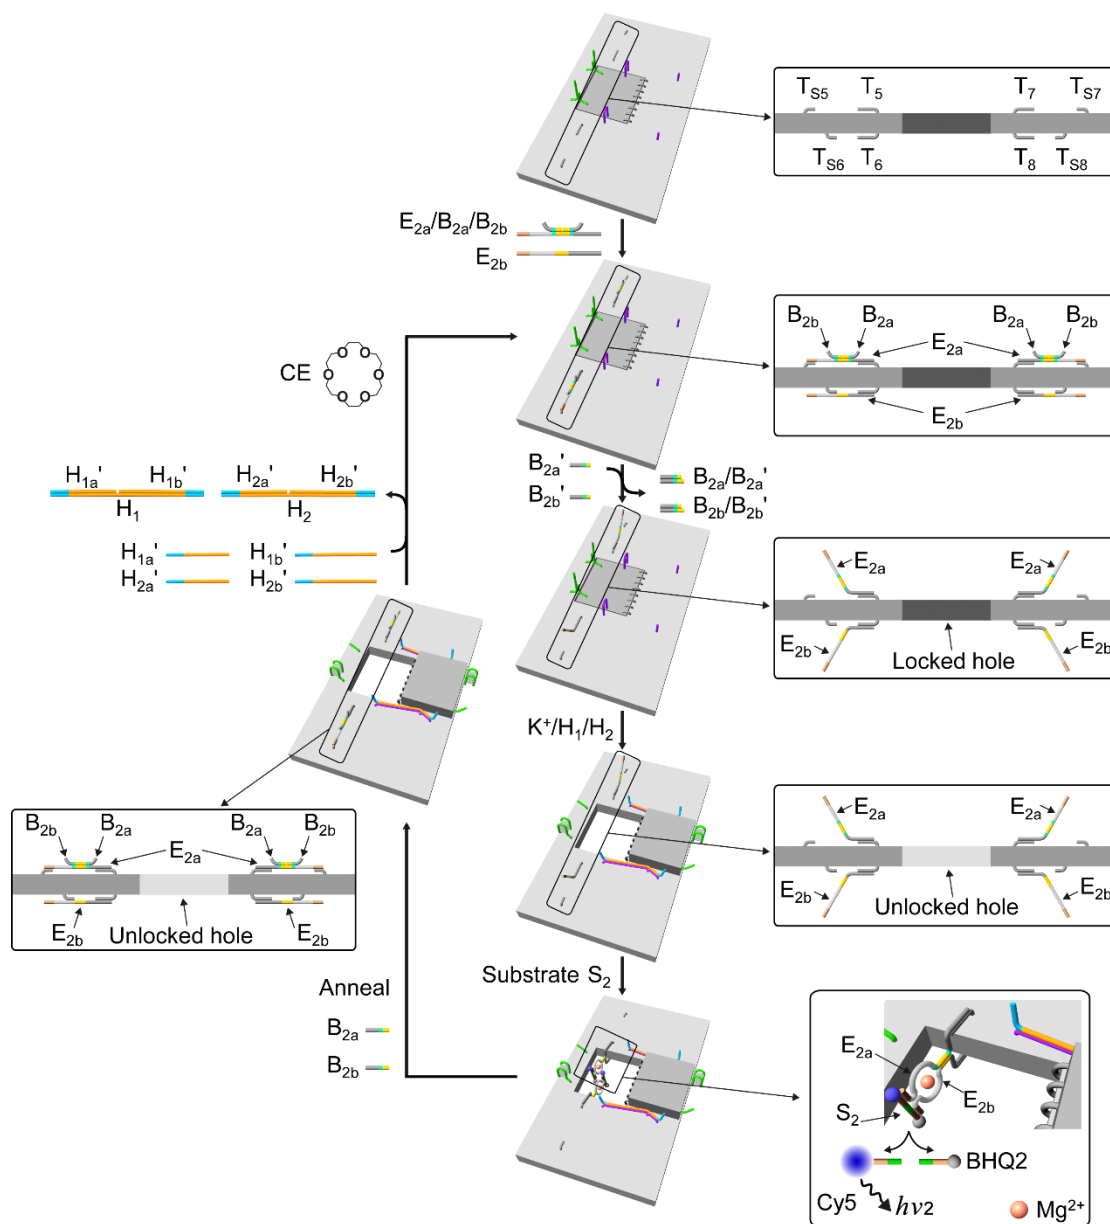

Figure S38. Schematic of engineering of the G-quadruplex-responsive origami tile (only showing the core part of the tile) and the switchable catalysis of the  $Mg^{2+}$ -ion-dependent DNAzyme in the nanocavity. The tile includes the  $K^+$ -ion-driven unlocking system. Protruding tethers  $T_5/T_7$  and  $T_6/T_8$  are designed on the opposite sides of the origami tile. The duplex  $E_{2a}/B_{2a}/B_{2b}$  and the strand  $E_{2b}$  are hybridized with the tethers  $T_5/T_7$  and  $T_6/T_8$ , respectively. Prior to the unlocking of the tile,  $E_{2a}/B_{2a}/B_{2b}$  are unblocked by the strand displacement process, using appropriate anti-blockers ( $B_{2a}'/B_{2b}'$ ). The deblocked strand  $E_{2a}$  and strand  $E_{2b}$  correspond to the  $Mg^{2+}$ -ion-dependent DNAzyme subunits. The  $K^+$  ions induced unlocking of the origami tile, in the presence of the helper hairpins  $H_1$  and  $H_2$  leads to the formation of the nanocavity. The strands  $E_{2a}$  and  $E_{2b}$  assemble into formation of the active  $Mg^{2+}$ -ion-dependent DNAzyme that cleave the  $Cy5/BHQ2$ -modified substrate  $S_2$  to produce the  $Cy5$ -modified fragment in the confined nanocavity. Treatment of the catalytic system with the blockers  $B_{2a}$  and  $B_{2b}$  separates the  $Mg^{2+}$ -ion-dependent DNAzyme subunits and the

subsequent treatment of the tiles with crown ether (CE), in the presence of the respective counter-helper units ( $H_{1a}'/H_{1b}'/H_{2a}'/H_{2b}'$ ), leads to the closure of the nanocavity. The scheme represents the mechanistic path for the cyclic switching of the activity of the  $Mg^{2+}$ -ion-dependent DNAzyme in the confined nanocavity associated with the origami tile. The reversible switching of the fluorescence of Cy5 provides the readout signal for the “ON”/“OFF” switching of the catalytic functions of the system.

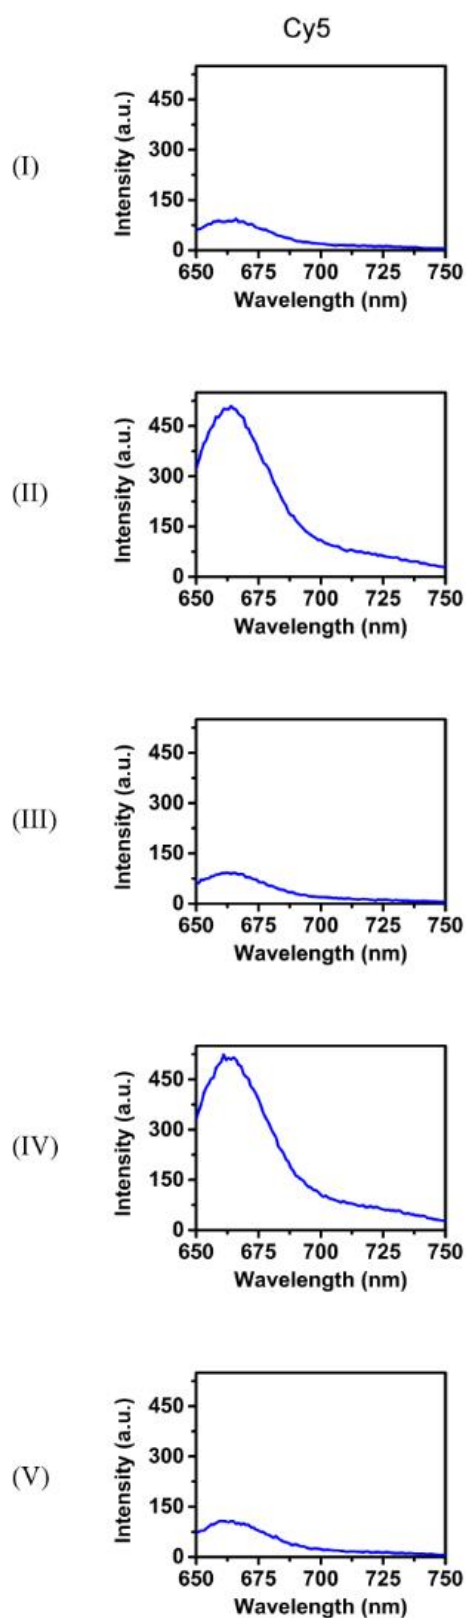

Figure S39. Fluorescence spectra corresponding to the cyclic activation and deactivation of the  $Mg^{2+}$ -ion-dependent DNAzyme in the G-quadruplex-responsive origami tiles. Panel I corresponds to the fluorescence response of the locked G-quadruplex-responsive origami tile. Panel II corresponds to the activated DNAzyme in the nanocavities as a result of the  $K^+$  ions,  $H_1/H_2$ -stimulated unlocking of the cavities.

Panel III to Panel V represent the fluorescence spectra of the system upon the cyclic closure-opening and reclosure of the nanocavities. The closed G-quadruplex-responsive origami tiles are generated by treatment of the open origami tiles with the counter strands H<sub>1a</sub>' and H<sub>1b</sub>', H<sub>2a</sub>' and H<sub>2b</sub>', and crown ether (CE). The re-opening of the G-quadruplex-responsive tiles involved the treatment of the closed state with K<sup>+</sup> ions and the hairpins H<sub>1</sub>/H<sub>2</sub>.

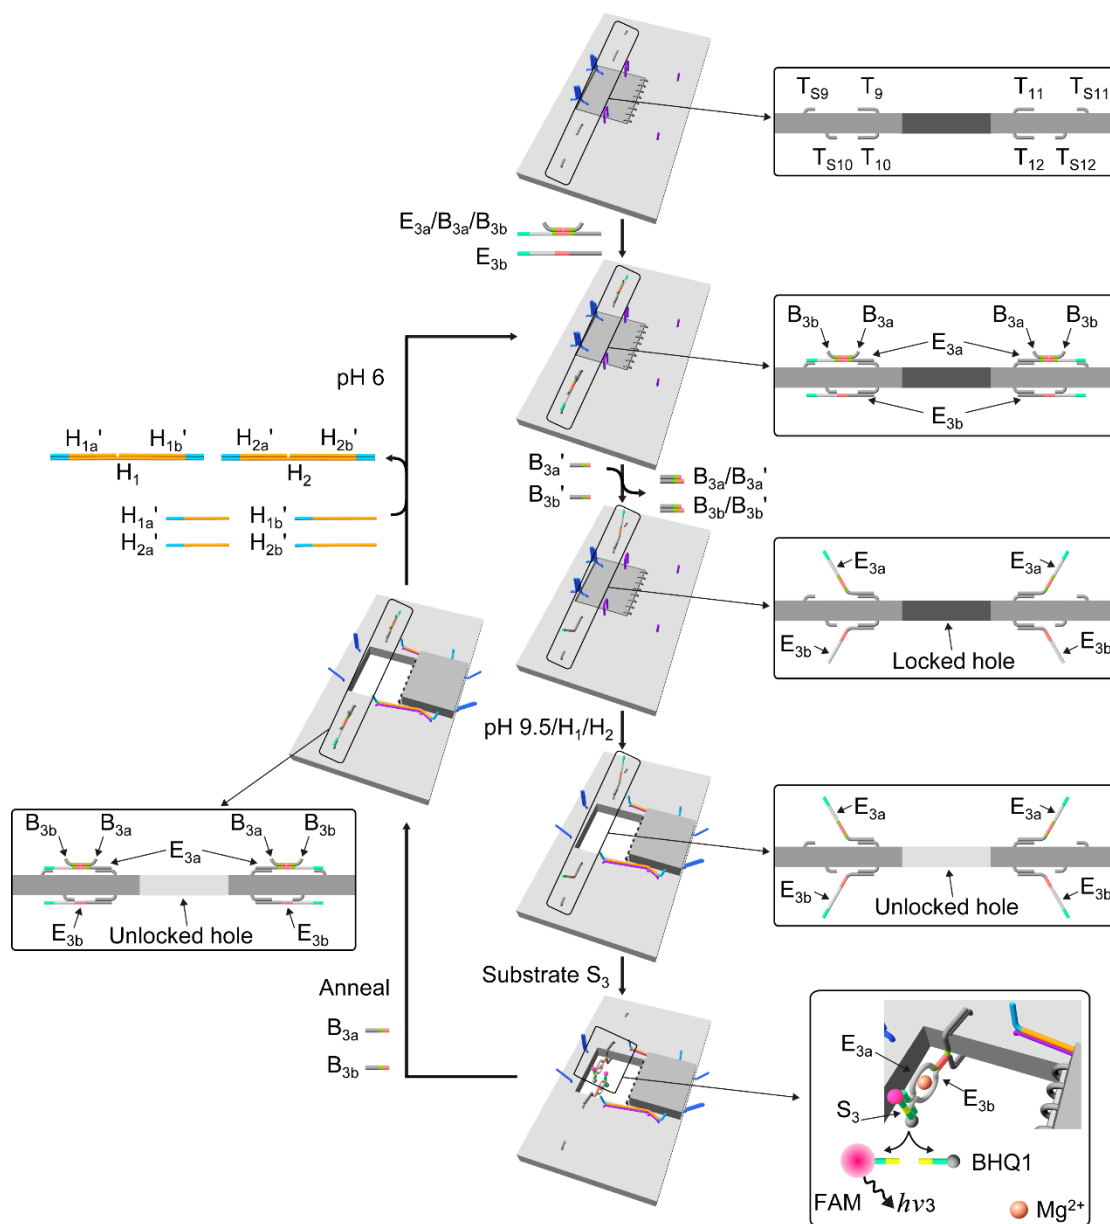

in the presence of the respective counter-helper units ( $H_{1a}'/H_{1b}'/H_{2a}'/H_{2b}'$ ), results in the closure of the nanocavities. The scheme represents the mechanistic path for the cyclic switching of the activity of the  $Mg^{2+}$ -ion-dependent DNAzyme in the confined nanocavity associated with the origami tile. The reversible switching of the fluorescence of FAM provides the readout signal for the “ON”/“OFF” switching of the catalytic functions of the system.

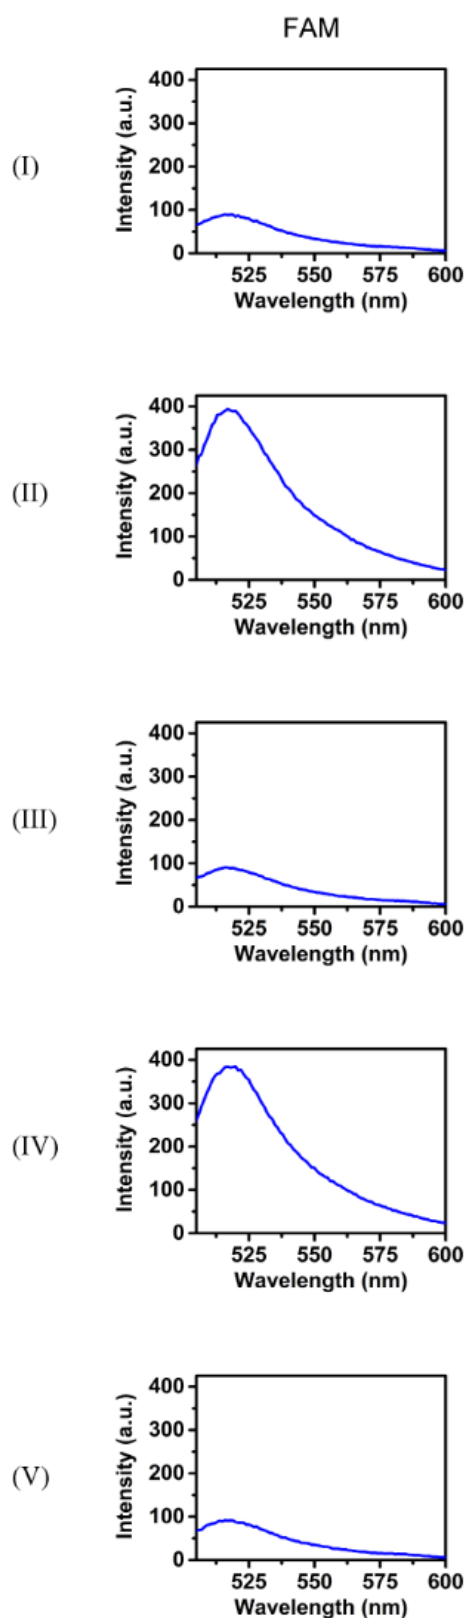

Figure S41. Fluorescence spectra corresponding to the cyclic activation and deactivation of the  $Mg^{2+}$ -ion-dependent DNAzyme in the pH-responsive origami tiles. Panel I corresponds to the fluorescence response of the locked pH-responsive origami tile. Panel II corresponds to the activated DNAzyme in the nanocavities as a result of the pH = 9.5,  $H_1/H_2$ -stimulated unlocking of the cavities. Panel III to Panel V represent



the fluorescence spectra of the system upon the cyclic closure-opening and reclosure of the nanocavities, The closed pH-responsive origami tiles are generated by treatment of the open origami tiles with the counter strands  $H_{1a}'$  and  $H_{1b}'$ ,  $H_{2a}'$  and  $H_{2b}'$ , at pH = 6. The re-opening of the pH-responsive tiles involved the treatment of the closed state with  $K^+$  ions and the hairpins  $H_1/H_2$ .

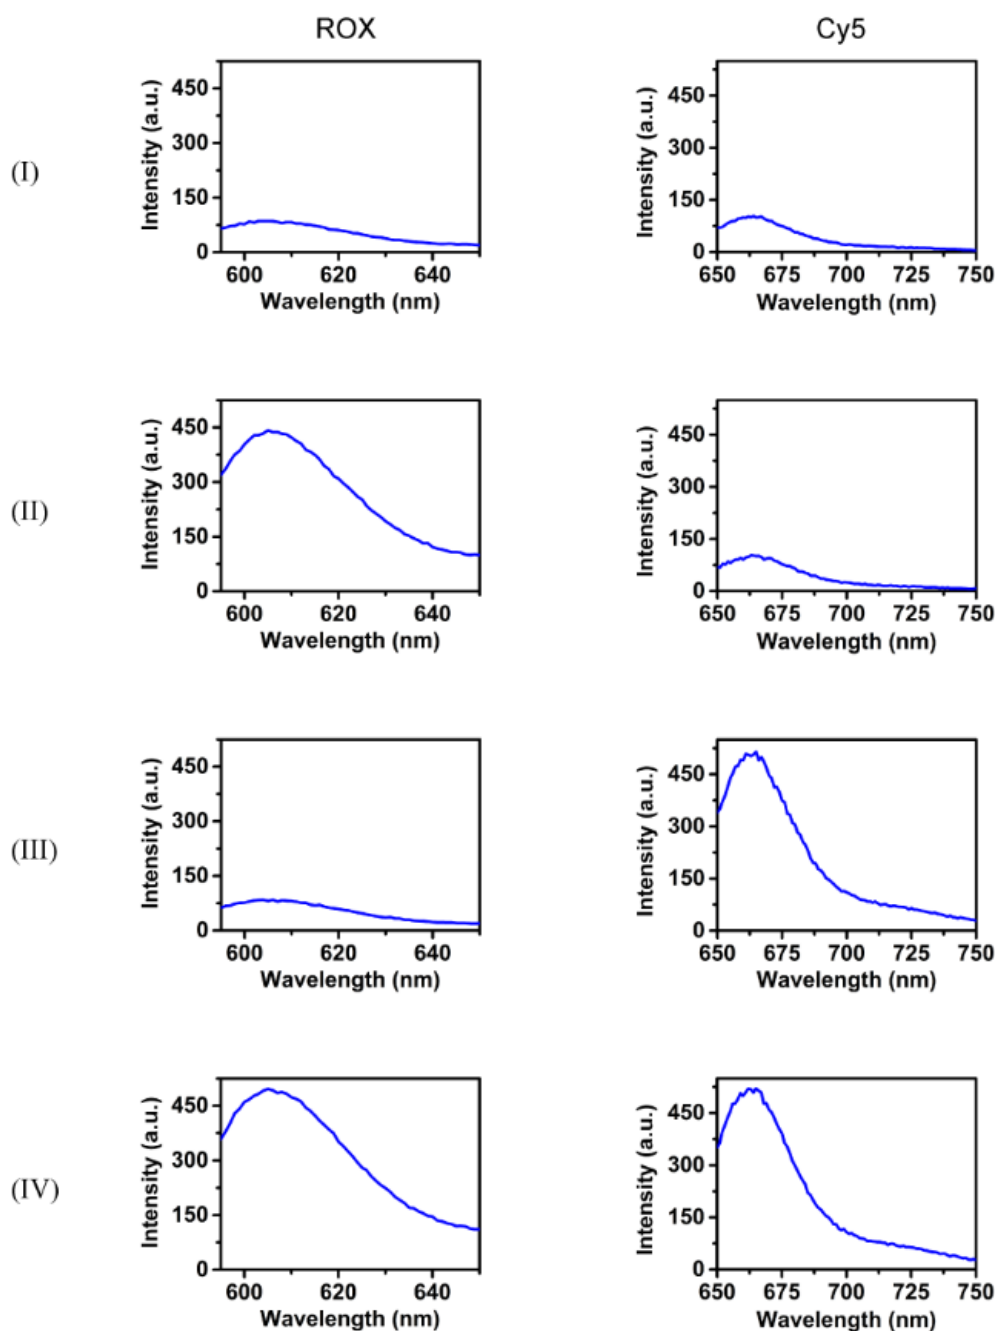

Figure S42. Fluorescence spectra corresponding to the programmed activation of the two  $\text{Mg}^{2+}$ -ion-dependent DNAzymes in the confined nanocavities in the ATP-/ $\text{K}^+$ -ion-responsive origami dimers. The programmed activation of the catalytic functions of the two  $\text{Mg}^{2+}$ -ion-dependent DNAzymes were performed by unlocking the nanocavities in the ATP-/ $\text{K}^+$ -ion-responsive origami dimer  $\text{D}_1$  by treatment with the  $\text{K}^+$  ions and/or ATP and the help hairpins  $\text{H}_1/\text{H}_2$ . Panel I — Fluorescence spectra of ROX (left) and Cy5 (right) generated by the locked origami dimers (shown in panel I of Fig. 8). Panel II — Fluorescence spectra of ROX (left) and Cy5 (right) generated upon selective unlocking of the dimer on the left with ATP (cf. panel II in Fig. 8). The fluorescence spectrum of ROX shows the enhanced intensity over the background signal generated in the confined cavity. Panel III — Fluorescence spectra of ROX (left) and Cy5 (right) upon subjecting the dimer to  $\text{K}^+$  ions (cf. process shown in panel III in Fig. 8). No

fluorescence change of ROX above the background signal is observed, while the fluorescence of Cy5 is enhanced as compared to the background fluorescence signal. Panel IV — Fluorescence spectra of ROX (left) and Cy5 (right) generated upon subjecting the dimer to the  $K^+$  ions and ATP (cf. process shown in panel IV of Fig. 8). The fluorescence of ROX and the fluorescence of Cy5 are intensified as compared to the background signals, consistent with the activation of the two DNazymes in the nanocavities.

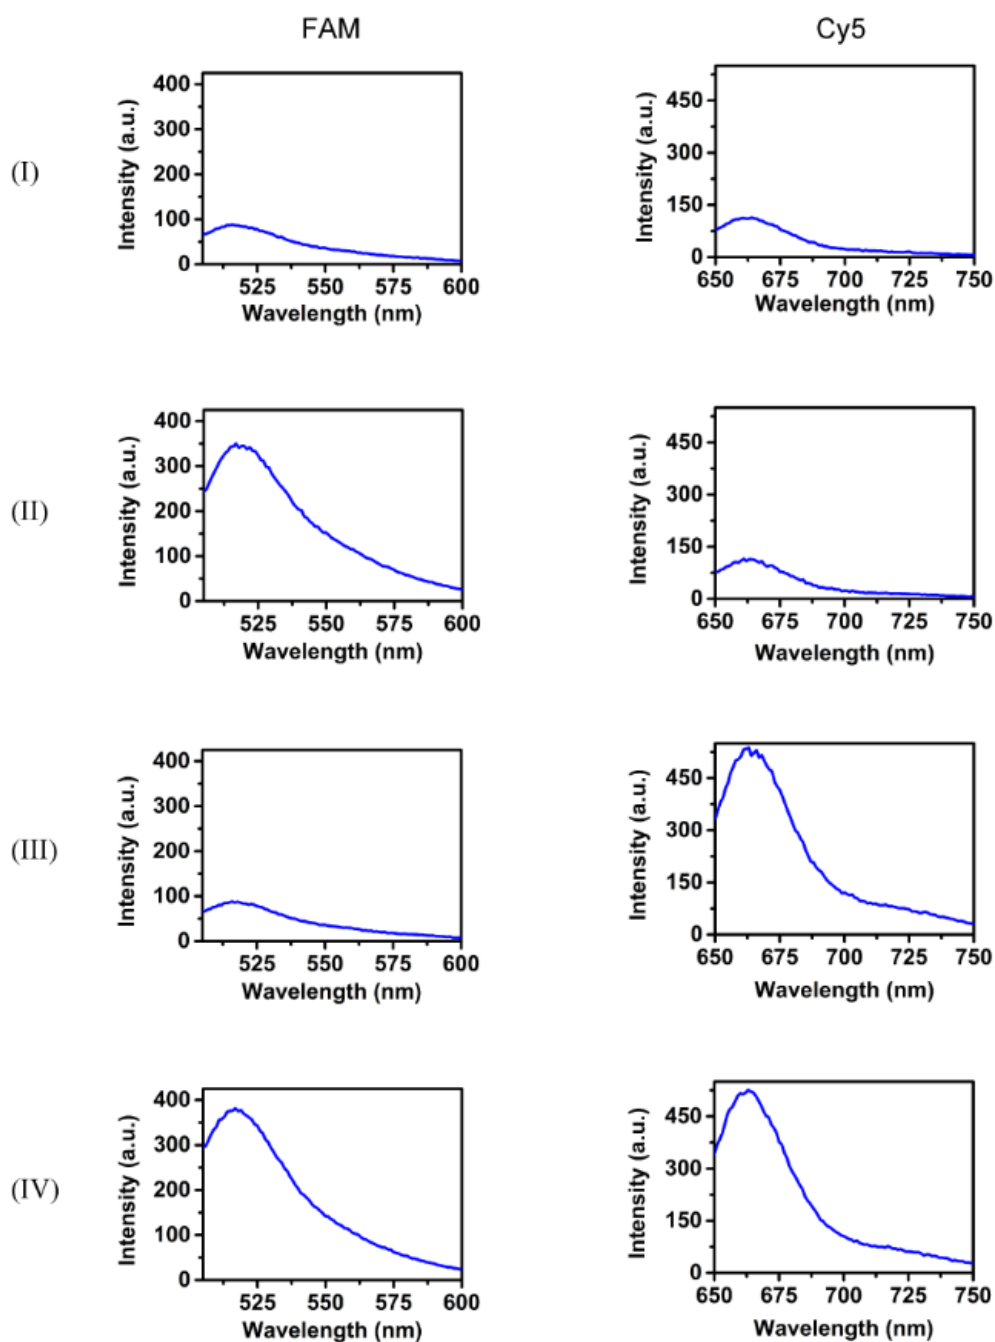

Figure S43. Fluorescence spectra corresponding to the programmed activation of the two  $\text{Mg}^{2+}$ -ion-dependent DNAzymes in the confined nanocavities of the pH-/ $\text{K}^+$ -ion-responsive origami dimers. The programmed activation of the catalytic functions of the two  $\text{Mg}^{2+}$ -ion-dependent DNAzymes were performed by unlocking the nanocavities in the pH-/ $\text{K}^+$ -ion-responsive origami dimer  $\text{D}_2$  by treatment with the  $\text{K}^+$  ions and/or pH = 9.5 buffer and the help hairpins  $\text{H}_1/\text{H}_2$ . Panel I — Fluorescence spectra of FAM (left) and Cy5 (right) generated by the locked origami dimers  $\text{D}_2$  (shown in panel I of Fig. 9). Panel II — Fluorescence spectra of FAM (left) and Cy5 (right) generated upon selective unlocking of the dimer  $\text{D}_2$  on the left at pH = 9.5 (cf. panel II in Fig. 9). The fluorescence spectrum of FAM shows the enhanced intensity over the background signal generated in the confined cavity. Panel III — Fluorescence spectra of FAM (left) and Cy5 (right) upon subjecting the dimer  $\text{D}_2$  to  $\text{K}^+$  ions (cf. process shown in panel III in Fig. 9). No

fluorescence change of FAM above the background signal is observed, while the fluorescence of Cy5 is enhanced as compared to the background fluorescence signal. Panel IV — Fluorescence spectra of FAM (left) and Cy5 (right) generated upon subjecting the dimer  $D_2$  to the  $K^+$  ions at  $pH = 9.5$  (cf. process shown in panel IV of Fig. 9). The fluorescence of FAM and the fluorescence of Cy5 are intensified as compared to the background signals, consistent with the activation of the two DNAzymes in the nanocavities.

## DNA Sequences

Staple sequences for the rectangle origami:

|    |                                    |
|----|------------------------------------|
| 1  | CAAGCCCAATAGGAAC CCATGTACAAACAGTT  |
| 2  | AATGCCCCGTAACAGT GCCCGTATCTCCCTCA  |
| 3  | TGCCTTGACTGCCTAT TTCGGAACAGGGATAG  |
| 4  | GAGCCGCCCCACCACC GGAACCGCGACGGAAA  |
| 5  | AACCAGAGACCCTCAG AACCGCCAGGGGTCAG  |
| 6  | TTATTCATAGGGAAGG TAAATATTCATTCAGT  |
| 7  | CATAACCCGAGGCATA GTAAGAGCTTTTTAAG  |
| 8  | ATTGAGGGTAAAGGTG AATTATCAATCACCGG  |
| 9  | AAAAGTAATATCTTAC CGAAGCCCTTCCAGAG  |
| 10 | GCAATAGCGCAGATAG CCGAACAATTCAACCG  |
| 11 | CCTAATTTACGCTAAC GAGCGTCTAATCAATA  |
| 12 | TCTTACCAGCCAGTTA CAAAATAAATGAAATA  |
| 13 | ATCGGCTGCGAGCATG TAGAAACCTATCATAT  |
| 14 | CTAATTTATCTTTCCT TATCATTATCCTGAA   |
| 15 | GCGTTATAGAAAAGC CTGTTTAGAAGGCCGG   |
| 16 | GCTCATTTTCGCATTA AATTTTTGAGCTTAGA  |
| 17 | AATTACTACAAATTCT TACCAGTAATCCCATC  |
| 18 | TTAAGACGTTGAAAAC ATAGCGATAACAGTAC  |
| 19 | TAGAATCCCTGAGAAG AGTCAATAGGAATCAT  |
| 20 | CTTTTACACAGATGAA TATACAGTAAACAATT  |
| 21 | TTAACGTTTCGGGAGA AACATAATTTTCCCT   |
| 22 | CGACA ACTAAGTATTA GACTTTACAATACCGA |
| 23 | GGATTTAGCGTATTAA ATCCTTTGTTTTCAGG  |
| 24 | ACGAACCAAACATCG CCATTAATGGTGGTT    |
| 25 | GAACGTGGCGAGAAAG GAAGGGAACAACTAT   |
| 26 | TAGCCCTACCAGCAGA AGATAAAAACATTTGA  |
| 27 | CGGCCTTGCTGGTAAT ATCCAGAACGAACTGA  |
| 28 | CTCAGAGCCACCACCC TCATTTTCTATTATT   |
| 29 | CTGAAACAGGTAATAA GTTTTAACCCCTCAGA  |
| 30 | AGTGTACTTGAAAGTA TTAAGAGGCCGCCACC  |
| 31 | GCCACCACTCTTTTCA TAATCAAACCGTCACC  |
| 32 | GTTTGCCACCTCAGAG CCGCCACCGATACAGG  |
| 33 | GACTTGAGAGACAAAA GGGCGACAAGTTACCA  |
| 34 | AGCGCCAACCATTGG GAATTAGATTATTAGC   |
| 35 | GAAGGAAAATAAGAGC AAGAAACAACAGCCAT  |
| 36 | GCCAATACCGAGGAA ACGCAATAGGTTTACC   |
| 37 | ATTATTTAACCAGCT ACAATTTTCAAGAACG   |
| 38 | TATTTTGCTCCCAATC CAAATAAGTGAGTTAA  |
| 39 | GGTATTAAGAACAAGA AAAATAATTAAGCCA   |
| 40 | TAAGTCCTACCAAGTA CCGCACTCTTAGTTGC  |

|    |                                   |
|----|-----------------------------------|
| 41 | ACGCTCAAATAAGAA TAAACACCGTGAATTT  |
| 42 | AGGCGTTACAGTAGGG CTTAATTGACAATAGA |
| 43 | ATCAAATCGTCGCTA TTAATTAACGGATTCG  |
| 44 | CTGTAAATCATAGGTC TGAGAGACGATAAATA |
| 45 | CCTGATTGAAAGAAAT TGCGTAGACCCGAACG |
| 46 | ACAGAAATCTTTGAAT ACCAAGTTCCTTGCTT |
| 47 | TTATTAATGCCGTCAA TAGATAATCAGAGGTG |
| 48 | AGATTAGATTTAAAAG TTTGAGTACACGTAAA |
| 49 | AGGCGGTCATTAGTCT TTAATGCGCAATATTA |
| 50 | GAATGGCTAGTATTAA CACCGCCTCAACTAAT |
| 51 | CCGCCAGCCATTGCAA CAGGAAAAATATTTTT |
| 52 | CCCTCAGAACCGCCAC CCTCAGAACTGAGACT |
| 53 | CCTCAAGAATACATGG CTTTTGATAGAACCAC |
| 54 | TAAGCGTCGAAGGATT AGGATTAGTACCGCCA |
| 55 | CACCAGAGTTCGGTCA TAGCCCCGCCAGCAA  |
| 56 | TCGGCATTCCGCCGCC AGCATTGACGTTCCAG |
| 57 | AATCACCAAATAGAAA ATTCATATATAACGGA |
| 58 | TCACAATCGTAGCACC ATTACCATCGTTTTCA |
| 59 | ATACCCAAGATAACCC ACAAGAATAAACGATT |
| 60 | ATCAGAGAAAGAACTG GCATGATTTTATTTTG |
| 61 | TTTTGTTTAAGCCTTA AATCAAGAATCGAGAA |
| 62 | AGGTTTTGAACGTCAA AAATGAAAGCGCTAAT |
| 63 | CAAGCAAGACGCGCCT GTTTATCAAGAATCGC |
| 64 | AATGCAGACCGTTTTT ATTTTCATCTTGCGGG |
| 65 | CATATTTAGAAATACC GACCGTGTTACCTTTT |
| 66 | AATGGTTTACAACGCC AACATGTAGTTCAGCT |
| 67 | TAACCTCCATATGTGA GTGAATAAACAAAATC |
| 68 | AAATCAATGGCTTAGG TTGGGTTACTAAATTT |
| 69 | GCGCAGAGATATCAAA ATTATTTGACATTATC |
| 70 | AACCTACCGCGAATTA TTCATTTCCAGTACAT |
| 71 | ATTTTGCGTCTTTAGG AGCACTAAGCAACAGT |
| 72 | CTAAAATAGAACAAAG AAACCACCAGGGTTAG |
| 73 | GCCACGCTATACGTGG CACAGACAACGCTCAT |
| 74 | GCGTAAGAGAGAGCCA GCAGCAAAAAGGTTAT |
| 75 | GGAAATACCTACATTT TGACGCTCACCTGAAA |
| 76 | TATCACCGTACTCAGG AGGTTTAGCGGGGTTT |
| 77 | TGCTCAGTCAGTCTCT GAATTTACCAGGAGGT |
| 78 | GGAAAGCGACCAGGCG GATAAGTGAATAGGTG |
| 79 | TGAGGCAGGCGTCAGA CTGTAGCGTAGCAAGG |
| 80 | TGCCTTTAGTCAGACG ATTGGCCTGCCAGAAT |
| 81 | CCGGAAACACACCACG GAATAAGTAAGACTCC |
| 82 | ACGCAAAGGTCACCAA TGAAACCAATCAAGTT |
| 83 | TTATTACGGTCAGAGG GTAATTGAATAGCAGC |

|     |                                              |
|-----|----------------------------------------------|
| 84  | TGAACAAACAGTATGT TAGCAAAC TAAAAGAA           |
| 85  | CTTTACAGTTAGCGAA CCTCCCGACGTAGGAA            |
| 86  | GAGGCGTTAGAGAATA ACATAAAAGAACACCC            |
| 87  | TCATTACCCGACAATA AACAAACATATTTAGGC           |
| 88  | CCAGACGAGCGCCCAA TAGCAAGCAAGAACGC            |
| 89  | AGAGGCATAATTTTCAT CTTCTGACTATAACTA           |
| 90  | TTTTAGTTTTTCGAGC CAGTAATAAATTCTGT            |
| 91  | TATGTAAACCTTTTTT AATGGAAAAATTACCT            |
| 92  | TTGAATTATGCTGATG CAAATCCACAAATATA            |
| 93  | GAGCAAAAACCTTCTGA ATAATGGAAGAAGGAG           |
| 94  | TGGATTATGAAGATGA TGAAACAAAATTTTCAT           |
| 95  | CGGAATTATTGAAAGG AATTGAGGTGAAAAAT            |
| 96  | ATCAACAGTCATCATA TTCCTGATTGATTGTT            |
| 97  | CTAAAGCAAGATAGAA CCCTTCTGAATCGTCT            |
| 98  | GCCAACAGTCACCTTG CTGAACCTGTTGGCAA            |
| 99  | GAAATGGATTATTTAC ATTGGCAGACATTCTG            |
| 100 | TTTT TATAAGTA TAGCCCGGCCGTCGAGAGGGTTGA       |
| 101 | TTTT ATAAATCC TCATTAATGATATTCACAAACAA        |
| 102 | TTTT AATCAGTA GCGACAGATCGATAGCAGCACCGT       |
| 103 | TTTT TAAAGGTG GCAACATAGTAGAAAATACATACA       |
| 104 | TTTT GACGGGAG AATTAAC TACAGGGAAGCGCATT       |
| 105 | TTTT GCTTATCC GGTATTCTAAATCAGATATAGAAG       |
| 106 | TTTT CGACAAAA GGTAAGTAGAGAAATATAAAGTAC       |
| 107 | TTTT CGCGAGAA AACTTTTTATCGCAAGACAAAGAA       |
| 108 | TTTT ATTAATTA CATTAAACACATCAAGAAAACAAA       |
| 109 | TTTT TTCATCAA TATAATCCTATCAGATGATGGCAA       |
| 110 | TTTT AATCAATA TCTGGTCACAAATATCAAACCCTC       |
| 111 | TTTT ACCAGTAA TAAAAGGGATTCACCA GTCACACG TTTT |
| 112 | CCGAAATCCGAAAATC CTGTTTGAAGCCGGAA            |
| 113 | CCAGCAGGGGCAAAT CCCTTATAAAGCCGGC             |
| 114 | GCATAAAGTTCCACAC AACATACGAAGCGCCA            |
| 115 | GCTCACAATGTAAAGC CTGGGGTGGGTTTGCC            |
| 116 | TTCGCCATTGCCGGAA ACCAGGCATTAATCA             |
| 117 | GCTTCTGGTCAGGCTG CGCAACTGTGTTATCC            |
| 118 | GTTAAAATTTTAACCA ATAGGAACCCGGCACC            |
| 119 | AGACAGTCATTCAAAA GGGTGAGAAGCTATAT            |
| 120 | AGGTAAAGAAATCACC ATCAATATAATATTTT            |
| 121 | TTTCATTTGGTCAATA ACCTGTTTATATCGCG            |
| 122 | TCGCAAATGGGGCGCG AGCTGAAATAATGTGT            |
| 123 | TTTTAATTGCCCGAAA GACTTCAAAACACTAT            |
| 124 | AAGAGGAACGAGCTTC AAAGCGAAGATACATT            |
| 125 | GGAATTACTCGTTTAC CAGACGACAAAAGATT            |
| 126 | GAATAAGGACGTAACA AAGCTGCTCTAAAACA            |



|     |                                    |
|-----|------------------------------------|
| 127 | CCAAATCACTTGCCCT GACGAGAACGCCAAAA  |
| 128 | CTCATCTTGAGGCAAA AGAATACAGTGAATTT  |
| 129 | AAACGAAATGACCCCC AGCGATTATTCATTAC  |
| 130 | CTTAAACATCAGCTTG CTTTCGAGCGTAACAC  |
| 131 | TCGGTTTAGCTTGATA CCGATAGTCCAACCTA  |
| 132 | TGAGTTTCGTCACCAG TACAACTTAATTGTA   |
| 133 | CCCCGATTTAGAGCTT GACGGGGAAATCAAAA  |
| 134 | GAATAGCCGCAAGCGG TCCACGCTCCTAATGA  |
| 135 | GAGTTGCACGAGATAG GGTGAGTAAGGGAGC   |
| 136 | GTGAGCTAGTTTCCTG TGTGAAATTTGGGAAG  |
| 137 | TCATAGCTACTCACAT TAATTGCGCCCTGAGA  |
| 138 | GCGATCGCACTCCAG CCAGCTTTGCCATCAA   |
| 139 | GAAGATCGGTGCGGGC CTCTTCGCAATCATGG  |
| 140 | AAATAATTTTAAATTG TAAACGTTGATATTCA  |
| 141 | GCAAATATCGCGTCTG GCCTTCCTGGCCTCAG  |
| 142 | ACCGTTCTAAATGCAA TGCCTGAGAGGTGGCA  |
| 143 | TATATTTTAGCTGATA AATTAATGTTGTATAA  |
| 144 | TCAATTCTTTTAGTTT GACCATTACCAGACCG  |
| 145 | CGAGTAGAACTAATAG TAGTAGCAAACCCTCA  |
| 146 | GAAGCAAAAAGCGGA TTGCATCAGATAAAAA   |
| 147 | TCAGAAGCCTCCAACA GGTCAGGATCTGCGAA  |
| 148 | CCAAAATATAATGCAG ATACATAAACACCAGA  |
| 149 | CATTCAACGCGAGAGG CTTTTGCATATTATAG  |
| 150 | ACGAGTAGTGACAAGA ACCGGATATACCAAGC  |
| 151 | AGTAATCTTAAATTGG GCTTGAGAGAATACCA  |
| 152 | GCGAAACATGCCACTA CGAAGGCATGCGCCGA  |
| 153 | ATACGTAAAAGTACAA CGGAGATTTTCATCAAG |
| 154 | CAATGACACTCCAAAA GGAGCCTTACAACGCC  |
| 155 | AAAAAAGGACAACCAT CGCCCACGCGGGTAAA  |
| 156 | TGTAGCATTCCACAGA CAGCCCTCATCTCCAA  |
| 157 | GTAAAGCACTAAATCG GAACCCTAGTTGTTCC  |
| 158 | AGTTTGGAGCCCTTCA CCGCCTGGTTGCGCTC  |
| 159 | AGCTGATTACAAGAGT CCACTATTGAGGTGCC  |
| 160 | ACTGCCC GCCGAGCTC GAATTCGTTATTACGC |
| 161 | CCCGGGTACTTTCCAG TCGGGAAACGGGCAAC  |
| 162 | CAGCTGGCGGACGACG ACAGTATCGTAGCCAG  |
| 163 | GTTTGAGGGAAAGGGG GATGTGCTAGAGGATC  |
| 164 | CTTTCATCCCCAAAAA CAGGAAGACCGGAGAG  |
| 165 | AGAAAAGCAACATTAA ATGTGAGCATCTGCCA  |
| 166 | GGTAGCTAGGATAAAA ATTTTTAGTTAACATC  |
| 167 | CAACGCAATTTTTGAG AGATCTACTGATAATC  |
| 168 | CAATAAATACAGTTGA TTCCCAATTTAGAGAG  |
| 169 | TCCATATACATACAGG CAAGGCAACTTTATTT  |

|     |                                         |
|-----|-----------------------------------------|
| 170 | TACCTTTAAGGTCTTT ACCCTGACAAAGAAGT       |
| 171 | CAAAAATCATTGCTCC TTTTGATAAGTTTCAT       |
| 172 | TTTGCCAGATCAGTTG AGATTAGTGGTTTAA        |
| 173 | AAAGATTCAGGGGGTA ATAGTAAACCATAAAT       |
| 174 | TTTCAACTATAGGCTG GCTGACCTTGTATCAT       |
| 175 | CCAGGCGCTTAATCAT TGTGAATTACAGGTAG       |
| 176 | CGCCTGATGGAAGTTT CCATTAAACATAACCG       |
| 177 | TTTCATGAAAATTGTG TCGAAATCTGTACAGA       |
| 178 | ATATATTCTTTTTTCA CGTTGAAAATAGTTAG       |
| 179 | AATAATAAGGTCGCTG AGGCTTGCAAAGACTT       |
| 180 | CGTAACGATCTAAAGT TTTGTCGTGAATTGCG       |
| 181 | ACCAAATCAAGTTTT TTGGGGTCAAAGAACG        |
| 182 | TGGACTCCCTTTTCAC CAGTGAGACCTGTCGT       |
| 183 | TGGTTTTTAACGTCAA AGGGCGAAGAACCATC       |
| 184 | GCCAGCTGCCTGCAGG TCGACTCTGCAAGGCG       |
| 185 | CTTGCATGCATTAATG AATCGGCCCGCCAGGG       |
| 186 | ATTAAGTTCGCATCGT AACCGTGCAGTAACA        |
| 187 | TAGATGGGGGGTAACG CCAGGGTTGTGCCAAG       |
| 188 | ACCCGTCGTCATATGT ACCCCGGTAAAGGCTA       |
| 189 | CATGTCAAGATTCTCC GTGGGAACCGTTGGTG       |
| 190 | TCAGGTCACTTTTGCG GGAGAAGCAGAATTAG       |
| 191 | CTGTAATATTGCCTGA GAGTCTGGAAAAGTAG       |
| 192 | CAAAATTAAGTACGG TGTCTGGAAGAGGTCA        |
| 193 | TGCAACTAAGCAATAA AGCCTCAGTTATGACC       |
| 194 | TTTTTGCGCAGAAAAC GAGAATGAATGTTTAG       |
| 195 | AAACAGTTGATGGCTT AGAGCTTATTTAAATA       |
| 196 | ACTGGATAACGGAACA ACATTATTACCTTATG       |
| 197 | ACGAACTAGCGTCCAA TACTGCGGAATGCTTT       |
| 198 | CGATTTTAGAGGACAG ATGAACGGCGCGACCT       |
| 199 | CTTTGAAAAGAAGTGG CTCATTATTTAATAAA       |
| 200 | GCTCCATGAGAGGCTT TGAGGACTAGGGAGTT       |
| 201 | ACGGCTACTTACTTAG CCGGAACGCTGACCAA       |
| 202 | AAAGGCCGAAAGGAAC AACTAAAGCTTTCCAG       |
| 203 | GAGAATAGCTTTTGCG GGATCGTCGGGTAGCA       |
| 204 | ACGTTAGTAAATGAAT TTTCTGTAAGCGGAGT       |
| 205 | TTTT CGATGGCC CACTACGTAAACCGTC TATCAGGG |
| 206 | TTTT CGGTTTGC GTATTGGGAACGCGCG GGGAGAGG |
| 207 | TTTT TGTA AAC GACGGCCATTCCCAGT CACGACGT |
| 208 | TTTT GTAATGGG ATAGGTCAAACGGCG GATTGACC  |
| 209 | TTTT GATGAACG GTAATCGTAGCAAACA AGAGAATC |
| 210 | TTTT GGTTGTAC CAAAACAAGCATAAA GCTAAATC  |
| 211 | TTTT CTGTAGCT CAACATGTATTGCTGA ATATAATG |
| 212 | TTTT CATTGAAT CCCCTCAAATCGTCA TAAATATT  |

|        |                                              |
|--------|----------------------------------------------|
| 213    | TTTT GGAAGAAA AATCTACGACCAGTCA GGACGTTG      |
| 214    | TTTT TCATAAGG GAACCGAAAGGCGCAG ACGGTCAA      |
| 215    | TTTT GACAGCAT CGGAACGAACCCTCAG CAGCGAAA      |
| 216    | TTTT AACTTTCA ACAGTTTCTGGGATTT TGCTAAAC TTTT |
| Loop1  | AACATCACTTGCCTGAGTAGAAGAAGT                  |
| Loop2  | TGTAGCAATACTTCTTTGATTAGTAAT                  |
| Loop3  | AGTCTGTCCATCACGCAAATTAACCGT                  |
| Loop4  | ATAATCAGTGAGGCCACCGAGTAAAAG                  |
| Loop5  | ACGCCAGAATCCTGAGAAGTGTTTTT                   |
| Loop6  | TAAAGGGATTTTAGACAGGAACGGT                    |
| Loop7  | AGAGCGGGAGCTAAACAGGAGGCCGA                   |
| Loop8  | TATAACGTGCTTTCCTCGTTAGAATC                   |
| Loop9  | GTAATATGGTTGCTTTGACGAGCAG                    |
| Loop10 | GCGCTTAATGCGCCGCTACAGGGCGC                   |

DNA sequences for the nano-cavities and the catalysis:

|                   |                                                                                                |
|-------------------|------------------------------------------------------------------------------------------------|
| L(1)              | GGGGTTAGGGGTTAGGGGTTAGGGGAGACTTTTTTTTTTAAGAA<br>AAGTAATATCTTACCGAAGCCCTTCCAGAG                 |
| L(2)              | GGGGTTAGGGGTTAGGGGTTAGGGGGTGATTTTAAGGCCGGAG<br>ACAGTCATTCAAAGGGTGAGAAGCTATAT                   |
| L'(1)             | CATAACCCGAGGCATAGTAAGAGCTTTTGTCTCTTCTAAC                                                       |
| L'(2)             | GCGTTATAGAAAAGCCTGTTTAGTTTTTCACCTTCTAAC                                                        |
| H <sub>a</sub>    | AATAGTGAATTTATCAAATTTTAAATTCAACTTTTTTACCATTTTA<br>ATTTTAAACCTTTTCCTTTTAAATAAGAATAAACACC        |
| H <sub>b</sub>    | ACAAAGTTACCAGAAGGATTTTCATCCATTCATTTTCATTACTTT<br>AATTCCTTAATTCTTTTCTTAGACAAAAGGGCGACA          |
| A <sub>1</sub>    | TTGGAAAAGGTTTTTCTTCTGACTATAACTA                                                                |
| A <sub>2</sub>    | CCGGAAACACACCACGTTTTTGAATGGATGTT                                                               |
| H <sub>1</sub>    | CAGCACACCTAGTTAACCTTTTCCTTTAAAAGGAAAAGGTTA<br>AAATTTAAATGGTAAAAAAGTTGAATTTAAAACGAGAGGTCAT<br>G |
| H <sub>2</sub>    | GTCAGGTCACAGAAGAAAAGAATTAAGGAATTAAGTAATGAA<br>AATGAATGGATGAAAAAATTCATCCATTCATTCCTACAGGTCAG     |
| H <sub>1a</sub> ' | CATGACCTCTCGTTTTAAATTCAACTTTTTTACCATTTTA                                                       |
| H <sub>1b</sub> ' | ATTTTAAACCTTTTCCTTTTTTAAAGGAAAAGGTTAACTAGGTGTG<br>CTG                                          |
| H <sub>2a</sub> ' | ATTACTTTAATTCCTTAATTCCTTTTCTTCTGTGACCTGAC                                                      |
| H <sub>2b</sub> ' | CTGACCTGTAGGAATGAATGGATGAATTTTTTCATCCATTCATT<br>TC                                             |
| H <sub>a-F</sub>  | AATAGTGAATTTATCAAATTTTAAATTCAACTTTTTTACCATTTTA<br>ATTTTAAACCTTTTCCTTTT[Cy3]AATAAGAATAAACACC    |
| A <sub>1-F</sub>  | Cy5-TTGGAAAAGGTTTTTCTTCTGACTATAACTA                                                            |

|                     |                                                                              |
|---------------------|------------------------------------------------------------------------------|
| H <sub>1-F</sub>    | GAAGAAAAACCTTTTCCTTTAAAAAGGAAAAGGTAAAATTA<br>AAATGGTAAAAAGTTGAATTTAAAA       |
| M(1)                | CATAACCCGAGGCATAGTAATTTTTTACCTGGGGGAGTATTGCG<br>GAGGAAGGTCCACTGTC            |
| M(2)                | GCGTTATAGAAAAAGCCTGTAATTTTACCTGGGGGAGTATTGCG<br>GAGGAAGGTCCACTGTC            |
| M'(1)               | ACTCCCCCAGGTTTTTAATAAGAAAAGTAATATCTTACCGAAGC<br>CCTTCCAGAG                   |
| M'(2)               | ACTCCCCCAGGTTTTTTCCGGAGACAGTCATTCAAAA                                        |
| C-ATP <sub>a</sub>  | CCTCAGACACGACAGTGGACCTTCCTCCGC                                               |
| C-ATP <sub>a'</sub> | GCGGAGGAAGGTCCACTGTCGTGTCTGAGG                                               |
| N(1)                | CATAACCCGAGGCATAGTAAGAGCTTTTTTCTTTTCTTTTCTTT<br>CTTTTTTAAGAAAAGAAAAGAAAAGAA  |
| N(2)                | GCGTTATAGAAAAAGCCTGTTTAGTTTTTTTCTTTTCTTTTCTTT<br>CTTTTTTAAGAAAAGAAAAGAAAAGAA |
| N'(1)               | TTCTTTTCTTTTCTTTTCTTTTTTTTTTAAGAAAAGTAATATCTT<br>ACCGAAGCCCTTCCAGAG          |
| N'(2)               | TTCTTTTCTTTTCTTTTCTTTTTTAAGGCCGGAGACAGTCATTCA<br>AAAGGGTGAGAAGCTATAT         |
| T <sub>1</sub>      | TTAAGACGTTGAAAACCTTTTGTAATGTGTCTCGTTCTG                                      |
| T <sub>2</sub>      | GTTGTAGAGCACTGTGGCTTTTTTAGAATCCCTGAGAAGAGTC                                  |
| T <sub>3</sub>      | TTCAACCGATTGAGGGTAAAGGTGTTTTTGTAATGTGTCTCGTT<br>CTG                          |
| T <sub>4</sub>      | GTTGTAGAGCACTGTGGCTTTTTTATTCATAGGGAAGGTAAATAT<br>TCATTCAGT                   |
| E <sub>1a</sub>     | CTGCTCAGCGATTAACACCTGTGATGCAGAGACCTGGAATTTTT<br>TCAGAACGAGACACATTAC          |
| E <sub>1b</sub>     | GCCACAGTGCTCTACAACCTTTTTCAGGTCTCTGCATCACGTTAC<br>ACCCATGT TCGTCA             |
| S <sub>1</sub>      | ROX-TGACGATrAGGAGCAG-BHQ2                                                    |
| T <sub>5</sub>      | TTAAGACGTTGAAAACCTTTTGAGCTGTATCACACGTAC                                      |
| T <sub>6</sub>      | GTAGTCCAACCTGTCTACTTTTTTAGAATCCCTGAGAAGAGTC                                  |
| T <sub>7</sub>      | TTCAACCGATTGAGGGTAAAGGTGTTTTTGAGCTGTATCACACG<br>TAC                          |
| T <sub>8</sub>      | GTAGTCCAACCTGTCTACTTTTTTATTCATAGGGAAGGTAAATATT<br>CATTTCAGT                  |
| E <sub>2a</sub>     | CTGCTCAGCGATTAACGATGGTCGTCTACAGACTGCCAGATTTT<br>TGTACGTGTGATACAGCTC          |
| E <sub>2b</sub>     | GTAGACAGGTTGGACTACTTTTTGCAGTCTGTAGACGACGTTAC<br>ACCCATGTTACTCT               |
| S <sub>2</sub>      | Cy5-AGAGTATrAGGAGCAG-BHQ2                                                    |
| T <sub>9</sub>      | TTAAGACGTTGAAAACCTTTTCATGATGGACACTCGATC                                      |
| T <sub>10</sub>     | GACTGGTCTGCTCATTACTTTTTTAGAATCCCTGAGAAGAGTC                                  |

|                  |                                                                     |
|------------------|---------------------------------------------------------------------|
| T <sub>11</sub>  | TTCAACCGATTGAGGGTAAAGGTGTTTTTCATGATGGACACTCG<br>ATC                 |
| T <sub>12</sub>  | GACTGGTCTGCTCATTACTTTTTTATTCATAGGGAAGGTAAATATT<br>CATTCAGT          |
| E <sub>3a</sub>  | GATATCAGCGATTAACGGTCCAACCTGTAGTTGCTCCTTCTTTTT<br>GATCGAGTGTCCATCATG |
| E <sub>3b</sub>  | GTAATGAGCAGACCAGTCTTTTTGAGCAACTACAGGTTGGTTAC<br>ACCCATGTTACTCT      |
| S <sub>3</sub>   | FAM-AGAGTATrAGGATATC-BHQ1                                           |
| T <sub>S1</sub>  | CTGAGCAGTTTTCTGTTTGAAGCCGGAA                                        |
| T <sub>S2</sub>  | GGATTTAGCGTATTAAATCCTTTGTTTTTCAGGTTTGTAACGTG                        |
| T <sub>S3</sub>  | CTGAGCAGTTTTTCATTTTCCTATTATT                                        |
| T <sub>S4</sub>  | AATGCCCCGTAACAGTGCCCGTATCTCCCTCATTTGTAACGTG                         |
| B <sub>1a</sub>  | CATCCGTCATTCCAGGTCTC                                                |
| B <sub>1b</sub>  | TGCATCACAGGTAGCCCCTT                                                |
| B <sub>1a'</sub> | CCTGGAATGACGGATG                                                    |
| B <sub>1b'</sub> | AAGGGGCTACCTGTGA                                                    |
| T <sub>S5</sub>  | CTGAGCAGTTTTCTGTTTGAAGCCGGAA                                        |
| T <sub>S6</sub>  | GGATTTAGCGTATTAAATCCTTTGTTTTTCAGGTTTGTAACGTC                        |
| T <sub>S7</sub>  | CTGAGCAGTTTTTCATTTTCCTATTATT                                        |
| T <sub>S8</sub>  | AATGCCCCGTAACAGTGCCCGTATCTCCCTCATTTGTAACGTC                         |
| B <sub>2a</sub>  | TACCCTTCTCTGGCAGTCTG                                                |
| B <sub>2b</sub>  | TAGACGACCATCAGTGCTCC                                                |
| B <sub>2a'</sub> | CTGCCAGAGAAGGGTA                                                    |
| B <sub>2b'</sub> | GGAGCACTGATGGTCG                                                    |
| T <sub>S9</sub>  | GCTGATATCTTTCTGTTTGAAGCCGGAA                                        |
| T <sub>S10</sub> | GGATTTAGCGTATTAAATCCTTTGTTTTTCAGGTTTGTAACCAAC                       |
| T <sub>S11</sub> | GCTGATATCTTTTCATTTTCCTATTATT                                        |
| T <sub>S12</sub> | AATGCCCCGTAACAGTGCCCGTATCTCCCTCATTTGTAACCAAC                        |
| B <sub>3a</sub>  | GTCCGTAGGAAGGAGCAACT                                                |
| B <sub>3b</sub>  | ACAGGTTGGACCTATCGTTC                                                |
| B <sub>3a'</sub> | GCTCCTTCTACGGAC                                                     |
| B <sub>3b'</sub> | GAACGATAGGTCCAAC                                                    |
| N8               | TTCAACCGATTGAGGGTAAAGGTGAATTATCAATCACCGG                            |
| N10              | GCAATAGCGCAGATAGCCGA                                                |
| N17              | GGAATCATAATACTACAAATTCTTACCAGTAATCCCATC                             |
| N19              | TAGAATCCCTGAGAAGAGTC                                                |
| N31              | GCCACCACTTTTTCATAATCAAACCGTCACCGACTTGAG                             |
| N34              | GGTTTACCAGCGCCAACCATTTGGGAATTAGATTATTAGC                            |
| N35              | ATAAGAGCAAGAAACAACAGCCAT                                            |
| N36              | GCCCAATACCGAGGAA                                                    |
| N38              | TATTTTGCTCCCAATC                                                    |
| N39              | GGTATTAAGAACAAGAAAATAATTAAAGCCAACGCTCAA                             |

|      |                                                                     |
|------|---------------------------------------------------------------------|
| N40  | TAAGTCCTACCAAGTA                                                    |
| N42  | AGGCGTTACAGTAGGG                                                    |
| N43  | CGTCGCTATTAATTAACGGATTCG                                            |
| N44  | CTGTAAATCATAGGTCTGAGAGAC                                            |
| N57  | AATCACCAAATAGAAAATTCATAT                                            |
| N59  | ATACCCAAGATAACCC                                                    |
| N61  | TTTTGTTTAAGCCTTA                                                    |
| N63  | CAAGCAAGACGCGCCT                                                    |
| N65  | CATATTTAGAAATACC                                                    |
| N67  | TACCTTTTTAACCTCCATATGTGAGTGAATAAACAAAATC                            |
| N81  | GAATAAGTAAGACTCC                                                    |
| N89  | AGAGGCATAATTTTCAT                                                   |
| N121 | TTTCATTTGGTCAATA                                                    |
| N123 | TTTTAATTGCCCGAAA                                                    |
| N28  | CTCAGAGCCACCACC                                                     |
| N-8  | AATTATCAATCACCGG                                                    |
| N18  | ATAGCGATAACAGTAC                                                    |
| N112 | CCGAAATCCGAAAATC                                                    |
| L216 | GTAGACAGTGTGTTTAACTTTCAACAGTTTCTGGGATTTTGCTA<br>AACTTTGACGAACTGACC  |
| L214 | GTAGACAGTGTGTTTTTCATAAGGGAACCGAAAGGCGCAGACGG<br>TCAATTTGACGAACTGACC |
| L212 | GTAGACAGTGTGTTTCATTGAATCCCCCTCAAATCGTCATAAAT<br>ATTTTGGACGAACTGACC  |
| L210 | CATCGTGTAGTCTTTGGTTGTACCAAAAACAAGCATAAAGCTAA<br>ATCTTTCTGAACATGAGC  |
| L208 | CATCGTGTAGTCTTTGTAATGGGATAGGTCAAACGGCGGATTG<br>ACCTTTCTGAACATGAGC   |
| L206 | CATCGTGTAGTCTTTGCGTTTGCATTTGGGAACGCGCGGGGAG<br>AGGTTTCTGAACATGAGC   |
| L100 | TATAAGTATAGCCCGGCCGTCGAGAGGGTTGATTTGGTCAGTTC<br>GTC                 |
| L101 | CACACTGTCTACTTTATAAATCCTCATTAATGATATTCACAAAC<br>AA                  |
| L102 | AATCAGTAGCGACAGATCGATAGCAGCACCGTTTTGGTCAGTTC<br>GTC                 |
| L103 | CACACTGTCTACTTTTAAAGGTGGCAACATAGTAGAAAATACAT<br>ACA                 |
| L104 | GACGGGAGAATTAACACTACAGGGAAGCGCATTATTTGGTCAGTT<br>CGTC               |
| L105 | CACACTGTCTACTTTGCTTATCCGGTATTCTAAATCAGATATAGA<br>AG                 |
| L106 | CGACAAAAGGTAAAGTAGAGAATATAAAGTACTTTGCTCATGTT                        |

|       |                                                                              |
|-------|------------------------------------------------------------------------------|
|       | CAG                                                                          |
| L107  | GACTACACGATGTTTCGCGAGAAAACCTTTTATCGCAAGACAA<br>AGAA                          |
| L108  | ATTAATTACATTTAACACATCAAGAAAACAAATTTGCTCATGTTC<br>AG                          |
| L109  | GACTACACGATGTTTTTCATCAATATAATCCTATCAGATGATGGC<br>AA                          |
| L110  | AATCAATATCTGGTCACAAATATCAAACCCTCTTTGCTCATGTTC<br>AG                          |
| L111  | GACTACACGATGTTTACCAGTAATAAAAGGGATTCACCAGTCAC<br>ACG                          |
| MH160 | ACTGCCCGCCGAGCTCATGAATCCTTTTGGATTCATCAAGTGCT<br>TTTTAGCACTTGGAATTCGTTATTACGC |
| MH162 | CAGCTGGCGGACGACGATGAATCCTTTTGGATTCATCAAGTGCT<br>TTTTAGCACTTGACAGTATCGTAGCCAG |
| MH163 | GTTTGAGGGAAAGGGGATGAATCCTTTTGGATTCATCAAGTGCT<br>TTTTAGCACTTGATGTGCTAGAGGATC  |
| MH165 | AGAAAAGCAACATTAATGAATCCTTTTGGATTCATCAAGTGCT<br>TTTTAGCACTTGATGTGAGCATCTGCCA  |
